# Supplementary material for: Streamlining Pediatric Vital Sign Assessment: Innovations and Insights
Source: Research Square preprint supplement (doi:10.21203/rs.3.rs-4173106/v1), 2024-04-11
Supplement: Supplementary file 1 [file d38e1df9fde1dd35528faf53.xlsx]

## Sheet: Introduction
	Supplementary information:
	This file contains LMS data for the distribution of vital signs by age in children, derived using the gamlss and sitar packages in R software.
	In the LMSfit function used for summarizing growth reference percentiles into L, M, and S curves, the terms L, M, and S stand for lambda (λ), mu (μ), and sigma (σ), respectively:
	Lambda (λ, represented as L): This is the Box-Cox transformation power used to normalize the distribution of growth measurements across different ages. The L value in the analysis represents the final Box-Cox transformation power after being smoothed over age. The Lopt value refers to the optimal Box-Cox transformation power calculated for each age, aiming to make the percentiles as close as poss…
	Mu (μ, represented as M): Signifies the median value of the growth measurements at each age, adjusted for the Box-Cox transformation.
	Sigma (σ, represented as S): Represents the coefficient of variation, indicating the spread or variability of the growth measurements around the median.
	The LMSfit function estimates the optimal Box-Cox transformation power, Lopt, for each age, which is aimed at making the percentiles as close to a normal distribution as possible. The corresponding median, Mopt, and coefficient of variation, Sopt, are then derived. These sets of values (Lopt, Mopt, Sopt) are smoothed over age to yield the final L (lambda), M (mu), and S (sigma) values, which coll…
	Additionally, it's noteworthy that the Excel file provided contains multiple tabs at the bottom, with each tab representing different sets of LMS data for various growth measurements. These tabs organize the LMS parameters (λ, μ, σ) for different measurements and ages, facilitating the analysis and comparison of growth patterns across the population. This organization in tabs enables easy access …
	This approach using the LMS method, which encapsulates lambda (λ, or L for Box-Cox transformation power), mu (μ, or M for the median), and sigma (σ, or S for the coefficient of variation), allows for a nuanced analysis of growth data. It ensures that the growth reference curves generated are tailored to reflect the natural variability and distribution of growth measurements across various ages. B…
	The use of these LMS curves provides a robust framework for growth monitoring and assessment. It offers a way to standardize growth measurements against a reference that accounts for age-specific variations in growth patterns, making it possible to accurately identify deviations from expected growth trajectories. This is crucial for early detection and management of growth-related issues in pedia…
	Moreover, the organization of LMS data across different tabs in the provided Excel file enhances the utility of this method. Each tab, dedicated to specific growth measurements, presents the lambda (λ), mu (μ), and sigma (σ) values calculated for those measurements across different ages. This tabular arrangement makes it easier for researchers and healthcare professionals to navigate through the …
	Abbreviations:
	SBP = systolic blood pressure
	DBP = diastolic blood pressure
	MBP = mean blood pressure
	HR = heart rate
	RR = respiratory rate

## Sheet: SBP
Age (months)	L	M	S	Lopt	Mopt	Sopt
0	0.978851	93.6983	0.151488	0.978135	91.2743	0.150988
1	0.979068	94.1545	0.150528	0.978229	92.2505	0.150677
2	0.979285	94.61	0.149568	0.978332	93.2113	0.150336
3	0.979502	95.0643	0.148607	0.978454	94.1412	0.149933
4	0.979719	95.5162	0.147647	0.978604	95.0248	0.149433
5	0.979936	95.9645	0.146687	0.978792	95.8465	0.148803
6	0.980152	96.4077	0.145727	0.979028	96.5911	0.148012
7	0.980368	96.8447	0.144768	0.979315	97.2475	0.147039
8	0.980584	97.2739	0.14381	0.979644	97.8235	0.145915
9	0.980799	97.6942	0.142854	0.980002	98.3313	0.14468
10	0.981013	98.1044	0.141901	0.980376	98.783	0.143377
11	0.981227	98.5034	0.140952	0.980755	99.1909	0.142044
12	0.981439	98.8904	0.140007	0.981126	99.5673	0.140724
13	0.98165	99.2646	0.139069	0.98148	99.9223	0.139448
14	0.981859	99.6252	0.138138	0.981818	100.259	0.138221
15	0.982067	99.9719	0.137216	0.982139	100.577	0.137042
16	0.982272	100.304	0.136303	0.982444	100.877	0.13591
17	0.982476	100.622	0.135402	0.982735	101.161	0.134821
18	0.982677	100.924	0.134512	0.983012	101.428	0.133775
19	0.982876	101.212	0.133636	0.983275	101.679	0.132771
20	0.983072	101.485	0.132774	0.983526	101.915	0.131806
21	0.983265	101.742	0.131928	0.983765	102.136	0.130879
22	0.983455	101.985	0.131098	0.983993	102.343	0.129989
23	0.983641	102.214	0.130286	0.98421	102.536	0.129135
24	0.983825	102.429	0.129492	0.984417	102.716	0.128316
25	0.984004	102.629	0.128717	0.984613	102.884	0.12753
26	0.98418	102.817	0.127961	0.984801	103.04	0.126776
27	0.984353	102.992	0.127226	0.984979	103.185	0.126053
28	0.984521	103.154	0.126511	0.985149	103.319	0.12536
29	0.984685	103.305	0.125818	0.985311	103.443	0.124697
30	0.984845	103.444	0.125146	0.985465	103.558	0.124062
31	0.985001	103.574	0.124496	0.985612	103.663	0.123455
32	0.985153	103.693	0.123868	0.985751	103.76	0.122874
33	0.9853	103.803	0.123262	0.985883	103.85	0.122319
34	0.985443	103.905	0.122678	0.986009	103.932	0.121789
35	0.985582	103.999	0.122116	0.986129	104.007	0.121283
36	0.985716	104.085	0.121576	0.986242	104.077	0.1208
37	0.985846	104.166	0.121058	0.98635	104.141	0.12034
38	0.985971	104.24	0.120562	0.986452	104.199	0.119903
39	0.986092	104.31	0.120088	0.986549	104.254	0.119486
40	0.986208	104.375	0.119634	0.986641	104.305	0.11909
41	0.98632	104.436	0.119202	0.986727	104.352	0.118714
42	0.986428	104.495	0.11879	0.986809	104.397	0.118357
43	0.986531	104.551	0.118398	0.986887	104.44	0.118019
44	0.98663	104.605	0.118026	0.98696	104.482	0.117699
45	0.986725	104.658	0.117673	0.987029	104.522	0.117396
46	0.986815	104.71	0.117339	0.987094	104.562	0.11711
47	0.986902	104.762	0.117023	0.987155	104.603	0.11684
48	0.986984	104.815	0.116725	0.987212	104.644	0.116586
49	0.987062	104.869	0.116444	0.987266	104.687	0.116347
50	0.987137	104.924	0.11618	0.987317	104.732	0.116122
51	0.987207	104.981	0.115932	0.987364	104.779	0.115911
52	0.987274	105.04	0.1157	0.987408	104.829	0.115714
53	0.987337	105.102	0.115483	0.987449	104.883	0.115529
54	0.987397	105.166	0.11528	0.987488	104.942	0.115356
55	0.987453	105.234	0.115092	0.987524	105.005	0.115195
56	0.987505	105.305	0.114917	0.987557	105.073	0.115045
57	0.987554	105.38	0.114755	0.987588	105.148	0.114905
58	0.9876	105.458	0.114605	0.987617	105.229	0.114775
59	0.987643	105.54	0.114467	0.987644	105.318	0.114655
60	0.987683	105.627	0.114341	0.987669	105.414	0.114543
61	0.98772	105.716	0.114225	0.987691	105.518	0.114439
62	0.987754	105.81	0.11412	0.987713	105.63	0.114344
63	0.987785	105.908	0.114025	0.987732	105.748	0.114256
64	0.987813	106.009	0.11394	0.98775	105.872	0.114176
65	0.987839	106.113	0.113863	0.987766	106.001	0.114103
66	0.987863	106.221	0.113796	0.98778	106.134	0.114037
67	0.987884	106.333	0.113737	0.987793	106.27	0.113978
68	0.987902	106.447	0.113686	0.987805	106.409	0.113926
69	0.987919	106.564	0.113642	0.987815	106.549	0.11388
70	0.987933	106.683	0.113606	0.987823	106.69	0.113841
71	0.987945	106.805	0.113576	0.987831	106.831	0.113807
72	0.987955	106.929	0.113553	0.987837	106.97	0.113779
73	0.987963	107.055	0.113537	0.987842	107.108	0.113757
74	0.98797	107.183	0.113527	0.987846	107.245	0.11374
75	0.987974	107.312	0.113522	0.987848	107.379	0.113728
76	0.987977	107.443	0.113523	0.98785	107.513	0.113721
77	0.987979	107.574	0.11353	0.98785	107.646	0.11372
78	0.987978	107.707	0.113541	0.987849	107.778	0.113723
79	0.987976	107.841	0.113558	0.987847	107.909	0.113731
80	0.987973	107.975	0.113579	0.987845	108.04	0.113744
81	0.987969	108.11	0.113604	0.987841	108.17	0.113761
82	0.987963	108.246	0.113634	0.987836	108.301	0.113783
83	0.987955	108.382	0.113669	0.98783	108.432	0.113809
84	0.987947	108.518	0.113707	0.987824	108.564	0.113839
85	0.987937	108.655	0.113749	0.987816	108.696	0.113873
86	0.987927	108.791	0.113795	0.987808	108.829	0.113912
87	0.987915	108.928	0.113845	0.987799	108.962	0.113954
88	0.987902	109.065	0.113898	0.987788	109.096	0.114
89	0.987888	109.203	0.113955	0.987777	109.23	0.11405
90	0.987874	109.34	0.114015	0.987766	109.364	0.114103
91	0.987858	109.477	0.114079	0.987753	109.499	0.11416
92	0.987841	109.614	0.114145	0.98774	109.634	0.114221
93	0.987824	109.751	0.114215	0.987726	109.769	0.114285
94	0.987806	109.888	0.114288	0.987711	109.905	0.114353
95	0.987787	110.025	0.114364	0.987695	110.04	0.114423
96	0.987767	110.162	0.114442	0.987679	110.175	0.114497
97	0.987746	110.298	0.114524	0.987662	110.311	0.114574
98	0.987725	110.435	0.114608	0.987644	110.446	0.114654
99	0.987703	110.571	0.114695	0.987626	110.581	0.114737
100	0.987681	110.708	0.114785	0.987607	110.715	0.114823
101	0.987658	110.844	0.114877	0.987587	110.85	0.114912
102	0.987634	110.98	0.114972	0.987566	110.985	0.115004
103	0.987609	111.116	0.115069	0.987545	111.12	0.115099
104	0.987585	111.251	0.115169	0.987524	111.254	0.115196
105	0.987559	111.387	0.115272	0.987501	111.389	0.115296
106	0.987533	111.522	0.115377	0.987479	111.524	0.115399
107	0.987506	111.658	0.115484	0.987455	111.658	0.115504
108	0.987479	111.793	0.115594	0.987431	111.793	0.115612
109	0.987451	111.928	0.115706	0.987406	111.927	0.115722
110	0.987423	112.063	0.11582	0.987381	112.062	0.115835
111	0.987395	112.198	0.115936	0.987355	112.197	0.11595
112	0.987365	112.333	0.116055	0.987329	112.331	0.116067
113	0.987336	112.468	0.116176	0.987302	112.466	0.116187
114	0.987306	112.603	0.1163	0.987275	112.601	0.11631
115	0.987275	112.737	0.116425	0.987246	112.735	0.116434
116	0.987244	112.872	0.116553	0.987218	112.87	0.116561
117	0.987213	113.006	0.116683	0.987189	113.004	0.11669
118	0.987181	113.141	0.116815	0.987159	113.139	0.116821
119	0.987148	113.275	0.116948	0.987129	113.273	0.116954
120	0.987115	113.409	0.117085	0.987099	113.408	0.117089
121	0.987082	113.544	0.117223	0.987067	113.542	0.117226
122	0.987049	113.678	0.117363	0.987036	113.676	0.117365
123	0.987015	113.812	0.117505	0.987004	113.81	0.117507
124	0.98698	113.946	0.117649	0.986971	113.944	0.11765
125	0.986945	114.079	0.117795	0.986938	114.078	0.117795
126	0.98691	114.213	0.117943	0.986904	114.212	0.117942
127	0.986874	114.347	0.118093	0.98687	114.346	0.118091
128	0.986838	114.481	0.118245	0.986836	114.48	0.118242
129	0.986801	114.614	0.118398	0.986801	114.614	0.118395
130	0.986764	114.748	0.118554	0.986765	114.747	0.118549
131	0.986727	114.881	0.118711	0.986729	114.881	0.118706
132	0.986689	115.015	0.11887	0.986693	115.014	0.118864
133	0.986651	115.148	0.119031	0.986656	115.148	0.119024
134	0.986613	115.281	0.119194	0.986619	115.281	0.119186
135	0.986574	115.414	0.119358	0.986581	115.414	0.119349
136	0.986534	115.547	0.119524	0.986542	115.547	0.119514
137	0.986495	115.68	0.119692	0.986504	115.68	0.119681
138	0.986455	115.813	0.119862	0.986465	115.813	0.119849
139	0.986414	115.946	0.120033	0.986425	115.946	0.120019
140	0.986373	116.078	0.120206	0.986385	116.079	0.120191
141	0.986332	116.211	0.12038	0.986345	116.212	0.120364
142	0.986291	116.343	0.120556	0.986304	116.344	0.120538
143	0.986249	116.476	0.120734	0.986263	116.477	0.120714
144	0.986207	116.608	0.120912	0.986221	116.609	0.120891
145	0.986164	116.74	0.121093	0.986179	116.741	0.12107
146	0.986121	116.872	0.121275	0.986137	116.873	0.12125
147	0.986078	117.004	0.121458	0.986094	117.006	0.121432
148	0.986034	117.136	0.121643	0.986051	117.138	0.121615
149	0.98599	117.268	0.121829	0.986007	117.269	0.121799
150	0.985946	117.399	0.122016	0.985963	117.401	0.121985
151	0.985902	117.531	0.122204	0.985918	117.533	0.122173
152	0.985857	117.662	0.122394	0.985873	117.664	0.122363
153	0.985812	117.794	0.122585	0.985828	117.796	0.122554
154	0.985766	117.925	0.122777	0.985782	117.927	0.122746
155	0.985721	118.056	0.12297	0.985735	118.058	0.122941
156	0.985675	118.187	0.123164	0.985688	118.189	0.123137
157	0.985628	118.318	0.123359	0.985641	118.32	0.123335
158	0.985582	118.449	0.123554	0.985593	118.451	0.123535
159	0.985535	118.58	0.123751	0.985544	118.581	0.123735
160	0.985488	118.711	0.123948	0.985495	118.712	0.123938
161	0.985441	118.841	0.124146	0.985446	118.842	0.124141
162	0.985393	118.972	0.124345	0.985397	118.973	0.124345
163	0.985346	119.102	0.124544	0.985347	119.103	0.12455
164	0.985298	119.233	0.124744	0.985297	119.233	0.124755
165	0.98525	119.363	0.124944	0.985247	119.363	0.12496
166	0.985202	119.494	0.125145	0.985197	119.493	0.125166
167	0.985153	119.624	0.125346	0.985147	119.623	0.125371
168	0.985105	119.754	0.125547	0.985096	119.753	0.125577
169	0.985056	119.884	0.125748	0.985046	119.883	0.125781
170	0.985007	120.014	0.12595	0.984996	120.013	0.125986
171	0.984958	120.145	0.126152	0.984946	120.143	0.12619
172	0.984909	120.275	0.126353	0.984896	120.273	0.126393
173	0.984859	120.405	0.126555	0.984845	120.403	0.126596
174	0.98481	120.535	0.126757	0.984795	120.534	0.126799
175	0.984761	120.665	0.126958	0.984745	120.664	0.127001
176	0.984711	120.795	0.12716	0.984695	120.794	0.127203
177	0.984661	120.925	0.127361	0.984645	120.924	0.127404
178	0.984612	121.055	0.127562	0.984595	121.054	0.127605
179	0.984562	121.185	0.127763	0.984545	121.184	0.127806
180	0.984512	121.315	0.127964	0.984494	121.314	0.128006
181	0.984462	121.445	0.128164	0.984444	121.444	0.128205
182	0.984412	121.575	0.128364	0.984394	121.574	0.128404
183	0.984362	121.705	0.128564	0.984344	121.704	0.128603
184	0.984312	121.835	0.128763	0.984294	121.834	0.128801
185	0.984261	121.965	0.128962	0.984244	121.964	0.128999
186	0.984211	122.095	0.129161	0.984194	122.094	0.129197
187	0.984161	122.225	0.129359	0.984144	122.224	0.129394
188	0.984111	122.355	0.129557	0.984095	122.354	0.129591
189	0.98406	122.485	0.129755	0.984045	122.484	0.129787
190	0.98401	122.615	0.129952	0.983995	122.614	0.129983
191	0.98396	122.745	0.130149	0.983945	122.744	0.130178
192	0.983909	122.875	0.130346	0.983895	122.874	0.130373
193	0.983859	123.005	0.130542	0.983845	123.004	0.130568
194	0.983809	123.135	0.130738	0.983795	123.134	0.130762
195	0.983758	123.265	0.130933	0.983746	123.264	0.130956
196	0.983708	123.395	0.131128	0.983696	123.394	0.131149
197	0.983658	123.525	0.131323	0.983646	123.524	0.131342
198	0.983607	123.655	0.131517	0.983596	123.654	0.131534
199	0.983557	123.785	0.131712	0.983547	123.785	0.131727
200	0.983506	123.915	0.131906	0.983497	123.915	0.131918
201	0.983456	124.045	0.132099	0.983447	124.045	0.13211
202	0.983406	124.175	0.132293	0.983398	124.175	0.132301
203	0.983355	124.305	0.132486	0.983348	124.305	0.132491
204	0.983305	124.435	0.132679	0.983299	124.435	0.132681
205	0.983255	124.565	0.132872	0.983249	124.565	0.132871
206	0.983204	124.695	0.133064	0.983199	124.695	0.13306
207	0.983154	124.825	0.133257	0.98315	124.825	0.133249
208	0.983103	124.955	0.133449	0.9831	124.955	0.133438
209	0.983053	125.085	0.133642	0.983051	125.085	0.133626
210	0.983003	125.215	0.133834	0.983001	125.215	0.133814
211	0.982952	125.345	0.134026	0.982952	125.345	0.134001
212	0.982902	125.475	0.134218	0.982903	125.475	0.134188
213	0.982851	125.605	0.13441	0.982853	125.605	0.134375
214	0.982801	125.735	0.134602	0.982804	125.735	0.134561
215	0.982751	125.865	0.134794	0.982755	125.865	0.134747
216	0.9827	125.995	0.134986	0.982705	125.995	0.134932

## Sheet: DBP
Age (months)	L	M	S	Lopt	Mopt	Sopt
0	0.961885	56.8192	0.199468	0.956076	55.1597	0.209275
1	0.96223	57.1234	0.198307	0.957581	55.8423	0.205961
2	0.962575	57.4272	0.197147	0.958995	56.5129	0.202781
3	0.962919	57.7301	0.195989	0.960304	57.1595	0.199778
4	0.963263	58.0315	0.194835	0.961494	57.7704	0.196993
5	0.963606	58.3303	0.193686	0.962556	58.3336	0.194463
6	0.963948	58.6259	0.192544	0.963483	58.8374	0.19222
7	0.964289	58.9172	0.191412	0.964271	59.2735	0.190284
8	0.964627	59.2035	0.190291	0.964942	59.6486	0.188616
9	0.964964	59.4839	0.189184	0.96552	59.973	0.187164
10	0.965298	59.7578	0.188092	0.966025	60.2569	0.185882
11	0.965628	60.0246	0.187017	0.966477	60.5106	0.184726
12	0.965956	60.2837	0.185961	0.966893	60.7443	0.183654
13	0.96628	60.5349	0.184925	0.967287	60.9667	0.182631
14	0.9666	60.7776	0.183909	0.967662	61.1797	0.18165
15	0.966916	61.0116	0.182916	0.96802	61.3835	0.180708
16	0.967227	61.2369	0.181947	0.968361	61.5786	0.179804
17	0.967534	61.4533	0.181001	0.968686	61.765	0.178937
18	0.967835	61.6607	0.18008	0.968997	61.9432	0.178104
19	0.968132	61.8592	0.179184	0.969293	62.1133	0.177304
20	0.968424	62.0489	0.178313	0.969576	62.2757	0.176536
21	0.96871	62.2298	0.177468	0.969846	62.4307	0.175798
22	0.96899	62.4022	0.176649	0.970105	62.5785	0.17509
23	0.969265	62.5663	0.175855	0.970352	62.7193	0.174409
24	0.969534	62.7222	0.175087	0.970588	62.8536	0.173755
25	0.969797	62.8703	0.174345	0.970814	62.9815	0.173127
26	0.970054	63.0109	0.173627	0.97103	63.1033	0.172522
27	0.970305	63.1442	0.172934	0.971237	63.2193	0.171941
28	0.97055	63.2706	0.172265	0.971435	63.3298	0.171382
29	0.970789	63.3905	0.17162	0.971626	63.435	0.170844
30	0.971022	63.5042	0.170997	0.971808	63.5353	0.170326
31	0.97125	63.612	0.170397	0.971983	63.6309	0.169827
32	0.971471	63.7144	0.169818	0.972151	63.722	0.169346
33	0.971686	63.8117	0.16926	0.972313	63.809	0.168882
34	0.971896	63.9043	0.168722	0.972468	63.8922	0.168435
35	0.9721	63.9925	0.168203	0.972618	63.9718	0.168002
36	0.972298	64.0768	0.167703	0.972762	64.048	0.167584
37	0.972491	64.1575	0.16722	0.972901	64.1212	0.167179
38	0.972678	64.235	0.166753	0.973036	64.1917	0.166787
39	0.97286	64.3096	0.166302	0.973166	64.2597	0.166406
40	0.973037	64.3817	0.165866	0.973292	64.3255	0.166036
41	0.973208	64.4516	0.165445	0.973414	64.3893	0.165676
42	0.973375	64.5196	0.165036	0.973533	64.4515	0.165326
43	0.973537	64.5862	0.16464	0.973649	64.5123	0.164984
44	0.973694	64.6515	0.164255	0.973762	64.572	0.164649
45	0.973846	64.7158	0.163881	0.973872	64.6309	0.164322
46	0.973994	64.7795	0.163517	0.97398	64.6892	0.164
47	0.974138	64.8428	0.163162	0.974086	64.7472	0.163684
48	0.974278	64.906	0.162816	0.97419	64.8053	0.163372
49	0.974414	64.9692	0.162478	0.974293	64.8636	0.163064
50	0.974546	65.0327	0.162147	0.974394	64.9225	0.162759
51	0.974674	65.0966	0.161822	0.974495	64.9822	0.162456
52	0.974798	65.1612	0.161504	0.974595	65.043	0.162155
53	0.974919	65.2265	0.161192	0.974694	65.1052	0.161854
54	0.975037	65.2927	0.160885	0.974793	65.1691	0.161554
55	0.975151	65.3598	0.160583	0.974892	65.2349	0.161253
56	0.975263	65.4281	0.160285	0.974991	65.3029	0.160951
57	0.975371	65.4974	0.159992	0.975091	65.3733	0.160647
58	0.975476	65.5679	0.159703	0.975191	65.4466	0.16034
59	0.975579	65.6395	0.159417	0.975292	65.5229	0.16003
60	0.975679	65.7122	0.159135	0.975394	65.6025	0.159716
61	0.975776	65.7859	0.158856	0.975497	65.6855	0.159397
62	0.975871	65.8607	0.158581	0.975601	65.7716	0.159075
63	0.975963	65.9364	0.158309	0.975706	65.8603	0.158752
64	0.976053	66.013	0.15804	0.97581	65.951	0.158428
65	0.976141	66.0902	0.157774	0.975914	66.0432	0.158104
66	0.976227	66.1681	0.157512	0.976017	66.1363	0.157783
67	0.97631	66.2464	0.157253	0.976119	66.2299	0.157464
68	0.976391	66.325	0.156998	0.976219	66.3235	0.157151
69	0.97647	66.4038	0.156747	0.976317	66.4165	0.156843
70	0.976547	66.4826	0.156499	0.976412	66.5083	0.156542
71	0.976622	66.5613	0.156254	0.976505	66.5985	0.15625
72	0.976696	66.6398	0.156014	0.976594	66.6866	0.155967
73	0.976767	66.7179	0.155778	0.97668	66.7721	0.155695
74	0.976837	66.7955	0.155546	0.976762	66.855	0.155433
75	0.976904	66.8725	0.155318	0.976841	66.9355	0.15518
76	0.97697	66.9488	0.155095	0.976918	67.0138	0.154937
77	0.977035	67.0243	0.154876	0.976991	67.0899	0.154704
78	0.977097	67.099	0.154662	0.977061	67.1639	0.154479
79	0.977158	67.1727	0.154452	0.977128	67.236	0.154262
80	0.977218	67.2455	0.154247	0.977193	67.3064	0.154053
81	0.977276	67.3172	0.154047	0.977256	67.3751	0.153852
82	0.977332	67.3879	0.153851	0.977316	67.4424	0.153658
83	0.977387	67.4575	0.15366	0.977374	67.5082	0.153471
84	0.977441	67.5261	0.153474	0.97743	67.5728	0.15329
85	0.977493	67.5936	0.153293	0.977484	67.6362	0.153116
86	0.977543	67.6601	0.153116	0.977536	67.6986	0.152947
87	0.977593	67.7256	0.152944	0.977586	67.76	0.152785
88	0.977641	67.7901	0.152777	0.977634	67.8205	0.152627
89	0.977687	67.8536	0.152614	0.977681	67.8801	0.152475
90	0.977733	67.9162	0.152456	0.977726	67.939	0.152328
91	0.977777	67.978	0.152302	0.97777	67.9971	0.152186
92	0.97782	68.0389	0.152153	0.977812	68.0545	0.152048
93	0.977862	68.099	0.152008	0.977853	68.1114	0.151915
94	0.977903	68.1585	0.151867	0.977892	68.1678	0.151786
95	0.977943	68.2173	0.15173	0.97793	68.2237	0.15166
96	0.977982	68.2755	0.151597	0.977967	68.2792	0.151539
97	0.97802	68.3332	0.151468	0.978003	68.3344	0.151421
98	0.978056	68.3905	0.151343	0.978038	68.3894	0.151306
99	0.978092	68.4473	0.151221	0.978072	68.4441	0.151194
100	0.978127	68.5038	0.151102	0.978105	68.4987	0.151086
101	0.978161	68.5601	0.150987	0.978137	68.5531	0.15098
102	0.978195	68.6161	0.150875	0.978169	68.6075	0.150877
103	0.978227	68.672	0.150766	0.978199	68.6619	0.150777
104	0.978258	68.7277	0.15066	0.978229	68.7164	0.150679
105	0.978289	68.7835	0.150557	0.978258	68.7709	0.150583
106	0.978319	68.8393	0.150457	0.978286	68.8256	0.150489
107	0.978349	68.8951	0.150359	0.978314	68.8804	0.150397
108	0.978378	68.9511	0.150263	0.978341	68.9356	0.150307
109	0.978406	69.0072	0.150169	0.978368	68.991	0.150219
110	0.978433	69.0636	0.150078	0.978394	69.0467	0.150132
111	0.97846	69.1202	0.149989	0.978419	69.1028	0.150047
112	0.978486	69.1771	0.149902	0.978445	69.1593	0.149963
113	0.978512	69.2343	0.149816	0.97847	69.2162	0.149881
114	0.978537	69.2919	0.149732	0.978494	69.2736	0.149799
115	0.978562	69.3499	0.14965	0.978518	69.3314	0.149719
116	0.978586	69.4083	0.14957	0.978542	69.3898	0.149639
117	0.97861	69.4671	0.14949	0.978566	69.4487	0.149561
118	0.978634	69.5263	0.149412	0.978589	69.5081	0.149483
119	0.978657	69.586	0.149336	0.978612	69.5682	0.149407
120	0.978679	69.6462	0.14926	0.978635	69.6288	0.149331
121	0.978701	69.7069	0.149186	0.978657	69.6901	0.149255
122	0.978723	69.768	0.149112	0.97868	69.7521	0.14918
123	0.978745	69.8297	0.14904	0.978702	69.8146	0.149106
124	0.978766	69.8918	0.148968	0.978724	69.8777	0.149032
125	0.978787	69.9543	0.148898	0.978746	69.9414	0.148959
126	0.978807	70.0174	0.148828	0.978768	70.0055	0.148886
127	0.978828	70.0809	0.148759	0.978789	70.0701	0.148814
128	0.978848	70.1448	0.14869	0.97881	70.1352	0.148743
129	0.978868	70.2092	0.148623	0.978832	70.2007	0.148672
130	0.978887	70.2739	0.148556	0.978852	70.2666	0.148602
131	0.978906	70.3391	0.148489	0.978873	70.3329	0.148532
132	0.978926	70.4046	0.148423	0.978894	70.3995	0.148463
133	0.978944	70.4705	0.148358	0.978914	70.4664	0.148394
134	0.978963	70.5367	0.148293	0.978934	70.5336	0.148327
135	0.978982	70.6032	0.148229	0.978954	70.601	0.148259
136	0.979	70.67	0.148166	0.978974	70.6687	0.148192
137	0.979018	70.7371	0.148103	0.978994	70.7366	0.148126
138	0.979036	70.8044	0.14804	0.979013	70.8047	0.148061
139	0.979054	70.8719	0.147978	0.979033	70.873	0.147996
140	0.979071	70.9396	0.147916	0.979052	70.9414	0.147931
141	0.979089	71.0074	0.147855	0.979071	71.01	0.147867
142	0.979106	71.0754	0.147794	0.979089	71.0786	0.147804
143	0.979123	71.1435	0.147734	0.979108	71.1474	0.147741
144	0.97914	71.2117	0.147674	0.979126	71.2162	0.147679
145	0.979157	71.28	0.147615	0.979144	71.2851	0.147618
146	0.979174	71.3483	0.147556	0.979162	71.3539	0.147557
147	0.97919	71.4166	0.147498	0.97918	71.4228	0.147496
148	0.979207	71.485	0.14744	0.979198	71.4917	0.147436
149	0.979223	71.5534	0.147382	0.979215	71.5604	0.147377
150	0.979239	71.6217	0.147325	0.979233	71.6292	0.147319
151	0.979255	71.69	0.147269	0.97925	71.6978	0.147261
152	0.979271	71.7583	0.147212	0.979267	71.7663	0.147203
153	0.979287	71.8264	0.147156	0.979283	71.8346	0.147147
154	0.979303	71.8946	0.147101	0.9793	71.9028	0.147091
155	0.979319	71.9626	0.147046	0.979316	71.9708	0.147036
156	0.979334	72.0305	0.146991	0.979332	72.0385	0.146981
157	0.97935	72.0984	0.146937	0.979348	72.1061	0.146927
158	0.979365	72.1661	0.146883	0.979364	72.1734	0.146874
159	0.979381	72.2338	0.14683	0.979379	72.2405	0.146821
160	0.979396	72.3013	0.146777	0.979394	72.3075	0.146769
161	0.979411	72.3688	0.146724	0.979409	72.3742	0.146718
162	0.979426	72.4361	0.146671	0.979424	72.4409	0.146667
163	0.979441	72.5034	0.146619	0.979439	72.5074	0.146616
164	0.979456	72.5705	0.146568	0.979454	72.5738	0.146565
165	0.979471	72.6375	0.146516	0.979469	72.6402	0.146515
166	0.979486	72.7045	0.146465	0.979483	72.7065	0.146465
167	0.9795	72.7714	0.146414	0.979498	72.7727	0.146416
168	0.979515	72.8381	0.146363	0.979512	72.8389	0.146366
169	0.97953	72.9048	0.146313	0.979527	72.9051	0.146317
170	0.979544	72.9715	0.146263	0.979541	72.9714	0.146267
171	0.979559	73.0381	0.146213	0.979556	73.0376	0.146218
172	0.979573	73.1046	0.146163	0.97957	73.1038	0.146169
173	0.979587	73.171	0.146114	0.979584	73.17	0.14612
174	0.979602	73.2374	0.146065	0.979599	73.2362	0.146071
175	0.979616	73.3038	0.146015	0.979613	73.3025	0.146022
176	0.97963	73.3701	0.145967	0.979627	73.3687	0.145973
177	0.979644	73.4364	0.145918	0.979641	73.4349	0.145924
178	0.979659	73.5027	0.145869	0.979656	73.5011	0.145876
179	0.979673	73.5689	0.145821	0.97967	73.5673	0.145827
180	0.979687	73.6351	0.145772	0.979684	73.6336	0.145779
181	0.979701	73.7013	0.145724	0.979698	73.6998	0.14573
182	0.979715	73.7675	0.145676	0.979712	73.766	0.145682
183	0.979729	73.8337	0.145628	0.979726	73.8322	0.145634
184	0.979743	73.8998	0.14558	0.97974	73.8984	0.145585
185	0.979756	73.966	0.145533	0.979754	73.9647	0.145537
186	0.97977	74.0321	0.145485	0.979768	74.0309	0.145489
187	0.979784	74.0983	0.145438	0.979782	74.0971	0.145442
188	0.979798	74.1644	0.14539	0.979796	74.1633	0.145394
189	0.979812	74.2305	0.145343	0.97981	74.2295	0.145346
190	0.979825	74.2967	0.145295	0.979823	74.2958	0.145298
191	0.979839	74.3628	0.145248	0.979837	74.362	0.145251
192	0.979853	74.4289	0.145201	0.979851	74.4282	0.145203
193	0.979866	74.4951	0.145154	0.979865	74.4944	0.145156
194	0.97988	74.5612	0.145107	0.979878	74.5606	0.145109
195	0.979894	74.6274	0.14506	0.979892	74.6269	0.145062
196	0.979907	74.6935	0.145013	0.979906	74.6931	0.145015
197	0.979921	74.7597	0.144966	0.979919	74.7593	0.144967
198	0.979935	74.8259	0.14492	0.979933	74.8255	0.144921
199	0.979948	74.892	0.144873	0.979946	74.8917	0.144874
200	0.979962	74.9582	0.144826	0.97996	74.9579	0.144827
201	0.979975	75.0244	0.14478	0.979973	75.0242	0.14478
202	0.979989	75.0905	0.144733	0.979987	75.0904	0.144734
203	0.980002	75.1567	0.144686	0.98	75.1566	0.144687
204	0.980016	75.2229	0.14464	0.980014	75.2228	0.144641
205	0.98003	75.2891	0.144593	0.980027	75.289	0.144594
206	0.980043	75.3553	0.144547	0.98004	75.3553	0.144548
207	0.980057	75.4214	0.1445	0.980054	75.4215	0.144502
208	0.98007	75.4876	0.144454	0.980067	75.4877	0.144456
209	0.980084	75.5538	0.144407	0.98008	75.5539	0.14441
210	0.980097	75.62	0.144361	0.980093	75.6201	0.144364
211	0.980111	75.6862	0.144314	0.980107	75.6864	0.144318
212	0.980124	75.7524	0.144268	0.98012	75.7526	0.144272
213	0.980138	75.8186	0.144221	0.980133	75.8188	0.144226
214	0.980151	75.8848	0.144175	0.980146	75.885	0.144181
215	0.980165	75.951	0.144129	0.980159	75.9512	0.144135
216	0.980178	76.0172	0.144082	0.980172	76.0174	0.14409

## Sheet: MBP
Age (months)	L	M	S	Lopt	Mopt	Sopt
0	0.975206	69.0889	0.163498	0.972342	67.2129	0.168797
1	0.975457	69.4512	0.162436	0.973036	67.9857	0.166785
2	0.975707	69.8131	0.161375	0.9737	68.746	0.164833
3	0.975958	70.174	0.160315	0.974329	69.4813	0.162955
4	0.976208	70.533	0.159257	0.974922	70.1793	0.161161
5	0.976457	70.8892	0.158202	0.975477	70.8274	0.15946
6	0.976706	71.2416	0.157151	0.975992	71.4133	0.15786
7	0.976955	71.5891	0.156105	0.976469	71.9282	0.156364
8	0.977202	71.9308	0.155067	0.97691	72.3786	0.154961
9	0.977448	72.2656	0.154037	0.977322	72.7746	0.153639
10	0.977692	72.5928	0.153017	0.977708	73.1265	0.152387
11	0.977935	72.9115	0.152007	0.978072	73.4445	0.151194
12	0.978176	73.2211	0.15101	0.978418	73.7387	0.150052
13	0.978414	73.521	0.150027	0.978747	74.0177	0.148954
14	0.97865	73.8108	0.149058	0.979062	74.2836	0.147896
15	0.978884	74.09	0.148106	0.979362	74.5367	0.146878
16	0.979114	74.3585	0.14717	0.979649	74.7774	0.145897
17	0.979342	74.6159	0.146252	0.979924	75.0061	0.144953
18	0.979566	74.8622	0.145352	0.980186	75.2231	0.144043
19	0.979787	75.0974	0.144472	0.980436	75.4289	0.143167
20	0.980005	75.3213	0.143612	0.980676	75.6239	0.142323
21	0.980219	75.5343	0.142773	0.980905	75.8083	0.141511
22	0.980428	75.7362	0.141955	0.981125	75.9827	0.140728
23	0.980634	75.9275	0.141158	0.981334	76.1474	0.139974
24	0.980836	76.1083	0.140383	0.981535	76.3027	0.139249
25	0.981033	76.2789	0.139631	0.981728	76.4491	0.13855
26	0.981226	76.4396	0.1389	0.981912	76.5869	0.137878
27	0.981415	76.5907	0.138192	0.982088	76.7165	0.13723
28	0.981599	76.7327	0.137507	0.982256	76.8384	0.136607
29	0.981778	76.866	0.136843	0.982418	76.9528	0.136008
30	0.981953	76.9909	0.136202	0.982572	77.0602	0.135431
31	0.982123	77.1079	0.135583	0.98272	77.161	0.134876
32	0.982289	77.2176	0.134986	0.982862	77.2554	0.134342
33	0.98245	77.3202	0.13441	0.982998	77.344	0.133828
34	0.982606	77.4163	0.133855	0.983128	77.4272	0.133334
35	0.982757	77.5065	0.133321	0.983252	77.5052	0.13286
36	0.982904	77.591	0.132807	0.983371	77.5784	0.132403
37	0.983047	77.6705	0.132314	0.983485	77.6473	0.131965
38	0.983184	77.7454	0.131839	0.983594	77.7123	0.131544
39	0.983317	77.8162	0.131384	0.983698	77.7736	0.131139
40	0.983446	77.8834	0.130948	0.983798	77.8318	0.13075
41	0.98357	77.9473	0.130529	0.983894	77.8871	0.130377
42	0.983689	78.0085	0.130128	0.983986	77.94	0.130018
43	0.983804	78.0673	0.129743	0.984073	77.9909	0.129674
44	0.983915	78.1243	0.129375	0.984157	78.0401	0.129343
45	0.984022	78.1797	0.129023	0.984238	78.088	0.129026
46	0.984125	78.2341	0.128686	0.984315	78.1349	0.128722
47	0.984224	78.2877	0.128364	0.984388	78.1814	0.128429
48	0.984318	78.341	0.128055	0.984459	78.2277	0.128149
49	0.984409	78.3942	0.12776	0.984526	78.2743	0.127879
50	0.984496	78.4477	0.127479	0.984591	78.3215	0.12762
51	0.98458	78.5018	0.127209	0.984653	78.3697	0.127372
52	0.98466	78.5567	0.126952	0.984712	78.4193	0.127133
53	0.984736	78.6127	0.126706	0.984769	78.4707	0.126904
54	0.98481	78.6699	0.126471	0.984824	78.5242	0.126683
55	0.984879	78.7287	0.126246	0.984876	78.5803	0.126471
56	0.984946	78.7891	0.126031	0.984927	78.6393	0.126266
57	0.98501	78.8513	0.125826	0.984975	78.7016	0.126069
58	0.985071	78.9154	0.125629	0.985022	78.7676	0.125879
59	0.985129	78.9814	0.125441	0.985067	78.8376	0.125696
60	0.985184	79.0495	0.125262	0.985111	78.9121	0.125518
61	0.985236	79.1196	0.12509	0.985153	78.9913	0.125346
62	0.985286	79.1917	0.124925	0.985194	79.0748	0.12518
63	0.985334	79.2658	0.124768	0.985233	79.1621	0.125019
64	0.985379	79.3418	0.124617	0.985271	79.2527	0.124864
65	0.985422	79.4198	0.124472	0.985307	79.346	0.124714
66	0.985463	79.4995	0.124334	0.985342	79.4416	0.124569
67	0.985501	79.5809	0.124201	0.985376	79.5388	0.124429
68	0.985538	79.6639	0.124074	0.985409	79.6373	0.124294
69	0.985573	79.7484	0.123952	0.985441	79.7364	0.124163
70	0.985606	79.8342	0.123835	0.985471	79.8357	0.124038
71	0.985637	79.9212	0.123723	0.9855	79.9346	0.123916
72	0.985666	80.0092	0.123615	0.985529	80.0326	0.1238
73	0.985694	80.0983	0.123512	0.985556	80.1293	0.123687
74	0.98572	80.1881	0.123413	0.985582	80.2247	0.123579
75	0.985745	80.2787	0.123317	0.985607	80.319	0.123475
76	0.985769	80.3699	0.123226	0.985631	80.4122	0.123374
77	0.985791	80.4616	0.123138	0.985654	80.5046	0.123278
78	0.985812	80.5538	0.123054	0.985676	80.5963	0.123185
79	0.985831	80.6462	0.122973	0.985698	80.6874	0.123096
80	0.98585	80.7389	0.122895	0.985718	80.7781	0.123011
81	0.985867	80.8319	0.122821	0.985738	80.8684	0.122928
82	0.985884	80.9249	0.122749	0.985757	80.9586	0.12285
83	0.985899	81.0181	0.122681	0.985775	81.0487	0.122774
84	0.985913	81.1112	0.122615	0.985792	81.1389	0.122702
85	0.985927	81.2044	0.122552	0.985809	81.2293	0.122632
86	0.985939	81.2975	0.122492	0.985825	81.32	0.122566
87	0.985951	81.3905	0.122434	0.98584	81.4108	0.122502
88	0.985962	81.4834	0.122379	0.985854	81.5017	0.122441
89	0.985973	81.5762	0.122326	0.985868	81.5927	0.122383
90	0.985982	81.6689	0.122276	0.985881	81.6838	0.122328
91	0.985991	81.7613	0.122228	0.985894	81.7749	0.122275
92	0.985999	81.8536	0.122182	0.985906	81.8659	0.122225
93	0.986007	81.9457	0.122138	0.985917	81.9569	0.122178
94	0.986014	82.0377	0.122097	0.985928	82.0478	0.122133
95	0.98602	82.1294	0.122058	0.985938	82.1385	0.12209
96	0.986026	82.2208	0.122021	0.985947	82.229	0.12205
97	0.986032	82.3121	0.121985	0.985956	82.3194	0.122012
98	0.986037	82.4032	0.121952	0.985965	82.4095	0.121977
99	0.986041	82.494	0.121921	0.985973	82.4995	0.121943
100	0.986045	82.5846	0.121892	0.98598	82.5892	0.121912
101	0.986049	82.675	0.121865	0.985987	82.6788	0.121883
102	0.986052	82.7652	0.12184	0.985994	82.7682	0.121855
103	0.986055	82.8552	0.121816	0.986	82.8575	0.12183
104	0.986057	82.945	0.121794	0.986005	82.9466	0.121807
105	0.986059	83.0345	0.121774	0.98601	83.0355	0.121786
106	0.986061	83.1239	0.121756	0.986015	83.1243	0.121767
107	0.986062	83.2131	0.12174	0.986019	83.213	0.121749
108	0.986063	83.3021	0.121725	0.986022	83.3016	0.121734
109	0.986063	83.3909	0.121712	0.986026	83.3901	0.12172
110	0.986064	83.4796	0.121701	0.986029	83.4785	0.121708
111	0.986064	83.568	0.121691	0.986031	83.5668	0.121698
112	0.986063	83.6564	0.121683	0.986033	83.6549	0.121689
113	0.986063	83.7445	0.121676	0.986035	83.743	0.121682
114	0.986062	83.8325	0.121671	0.986036	83.8309	0.121677
115	0.98606	83.9203	0.121668	0.986037	83.9187	0.121673
116	0.986059	84.008	0.121666	0.986037	84.0064	0.121671
117	0.986057	84.0955	0.121666	0.986038	84.094	0.12167
118	0.986055	84.1829	0.121667	0.986037	84.1815	0.121671
119	0.986053	84.2702	0.121669	0.986037	84.2688	0.121673
120	0.98605	84.3573	0.121673	0.986036	84.356	0.121677
121	0.986047	84.4442	0.121679	0.986035	84.443	0.121682
122	0.986044	84.5311	0.121686	0.986033	84.5299	0.121688
123	0.986041	84.6178	0.121694	0.986031	84.6167	0.121696
124	0.986037	84.7043	0.121703	0.986029	84.7034	0.121706
125	0.986034	84.7908	0.121714	0.986027	84.7899	0.121716
126	0.98603	84.8771	0.121727	0.986024	84.8763	0.121728
127	0.986025	84.9632	0.12174	0.986021	84.9625	0.121741
128	0.986021	85.0493	0.121755	0.986017	85.0486	0.121756
129	0.986016	85.1352	0.121771	0.986013	85.1346	0.121771
130	0.986011	85.221	0.121788	0.986009	85.2205	0.121788
131	0.986006	85.3066	0.121807	0.986005	85.3062	0.121806
132	0.986	85.3921	0.121826	0.986001	85.3918	0.121826
133	0.985995	85.4775	0.121847	0.985996	85.4773	0.121846
134	0.985989	85.5628	0.121869	0.985991	85.5627	0.121868
135	0.985983	85.648	0.121893	0.985985	85.6479	0.121891
136	0.985977	85.733	0.121917	0.98598	85.733	0.121914
137	0.98597	85.8179	0.121942	0.985974	85.818	0.121939
138	0.985964	85.9026	0.121969	0.985967	85.9028	0.121965
139	0.985957	85.9873	0.121997	0.985961	85.9875	0.121992
140	0.98595	86.0718	0.122025	0.985954	86.0721	0.12202
141	0.985942	86.1562	0.122055	0.985948	86.1566	0.12205
142	0.985935	86.2404	0.122086	0.98594	86.241	0.12208
143	0.985927	86.3245	0.122117	0.985933	86.3252	0.12211
144	0.985919	86.4085	0.12215	0.985925	86.4094	0.122142
145	0.985911	86.4924	0.122183	0.985918	86.4934	0.122175
146	0.985903	86.5762	0.122218	0.98591	86.5772	0.122209
147	0.985895	86.6598	0.122253	0.985901	86.661	0.122243
148	0.985886	86.7433	0.122289	0.985893	86.7446	0.122279
149	0.985877	86.8267	0.122326	0.985884	86.8282	0.122315
150	0.985869	86.91	0.122364	0.985875	86.9115	0.122353
151	0.98586	86.9931	0.122403	0.985866	86.9948	0.122391
152	0.98585	87.0761	0.122443	0.985857	87.0779	0.12243
153	0.985841	87.1591	0.122483	0.985847	87.1608	0.122471
154	0.985832	87.2419	0.122524	0.985838	87.2436	0.122512
155	0.985822	87.3246	0.122565	0.985827	87.3263	0.122554
156	0.985812	87.4072	0.122607	0.985817	87.4088	0.122597
157	0.985802	87.4896	0.12265	0.985807	87.4912	0.122642
158	0.985792	87.572	0.122694	0.985796	87.5734	0.122687
159	0.985782	87.6543	0.122738	0.985785	87.6555	0.122733
160	0.985772	87.7366	0.122782	0.985774	87.7375	0.12278
161	0.985761	87.8187	0.122827	0.985762	87.8193	0.122827
162	0.985751	87.9008	0.122873	0.985751	87.9011	0.122875
163	0.98574	87.9827	0.122919	0.985739	87.9828	0.122924
164	0.98573	88.0647	0.122965	0.985727	88.0645	0.122972
165	0.985719	88.1465	0.123012	0.985716	88.1461	0.123021
166	0.985708	88.2283	0.123059	0.985704	88.2276	0.123071
167	0.985697	88.3101	0.123106	0.985692	88.3092	0.12312
168	0.985686	88.3918	0.123153	0.98568	88.3907	0.123169
169	0.985675	88.4734	0.123201	0.985668	88.4722	0.123219
170	0.985664	88.555	0.123249	0.985657	88.5537	0.123268
171	0.985653	88.6366	0.123297	0.985645	88.6352	0.123317
172	0.985641	88.7182	0.123346	0.985633	88.7167	0.123366
173	0.98563	88.7997	0.123394	0.985621	88.7982	0.123415
174	0.985619	88.8812	0.123443	0.98561	88.8797	0.123463
175	0.985607	88.9627	0.123491	0.985598	88.9613	0.123512
176	0.985596	89.0442	0.12354	0.985586	89.0428	0.123561
177	0.985584	89.1256	0.123589	0.985575	89.1243	0.123609
178	0.985573	89.2071	0.123637	0.985563	89.2058	0.123658
179	0.985561	89.2886	0.123686	0.985551	89.2873	0.123706
180	0.985549	89.37	0.123735	0.98554	89.3688	0.123754
181	0.985538	89.4514	0.123784	0.985528	89.4503	0.123803
182	0.985526	89.5329	0.123832	0.985516	89.5319	0.123851
183	0.985514	89.6143	0.123881	0.985505	89.6134	0.123899
184	0.985503	89.6957	0.12393	0.985493	89.6949	0.123947
185	0.985491	89.7772	0.123978	0.985482	89.7764	0.123994
186	0.985479	89.8586	0.124027	0.98547	89.8579	0.124042
187	0.985468	89.9401	0.124075	0.985459	89.9394	0.12409
188	0.985456	90.0215	0.124123	0.985447	90.0209	0.124137
189	0.985444	90.1029	0.124172	0.985436	90.1024	0.124185
190	0.985432	90.1844	0.12422	0.985424	90.184	0.124232
191	0.985421	90.2658	0.124268	0.985413	90.2655	0.12428
192	0.985409	90.3473	0.124316	0.985401	90.347	0.124327
193	0.985397	90.4288	0.124364	0.98539	90.4285	0.124374
194	0.985385	90.5102	0.124412	0.985378	90.51	0.124421
195	0.985373	90.5917	0.12446	0.985367	90.5915	0.124468
196	0.985362	90.6732	0.124507	0.985356	90.673	0.124515
197	0.98535	90.7547	0.124555	0.985344	90.7545	0.124562
198	0.985338	90.8361	0.124602	0.985333	90.8361	0.124608
199	0.985326	90.9176	0.12465	0.985321	90.9176	0.124655
200	0.985315	90.9991	0.124697	0.98531	90.9991	0.124702
201	0.985303	91.0806	0.124744	0.985299	91.0806	0.124748
202	0.985291	91.1621	0.124792	0.985288	91.1621	0.124794
203	0.985279	91.2436	0.124839	0.985276	91.2436	0.124841
204	0.985268	91.3251	0.124886	0.985265	91.3251	0.124887
205	0.985256	91.4066	0.124933	0.985254	91.4066	0.124933
206	0.985244	91.4881	0.12498	0.985243	91.4882	0.124979
207	0.985233	91.5696	0.125027	0.985231	91.5697	0.125025
208	0.985221	91.6511	0.125074	0.98522	91.6512	0.125071
209	0.985209	91.7326	0.125121	0.985209	91.7327	0.125117
210	0.985197	91.8141	0.125168	0.985198	91.8142	0.125163
211	0.985186	91.8956	0.125215	0.985187	91.8957	0.125208
212	0.985174	91.9771	0.125262	0.985176	91.9772	0.125254
213	0.985162	92.0586	0.125309	0.985164	92.0587	0.125299
214	0.98515	92.1401	0.125355	0.985153	92.1402	0.125345
215	0.985139	92.2216	0.125402	0.985142	92.2218	0.12539
216	0.985127	92.3031	0.125449	0.985131	92.3033	0.125435

## Sheet: HR
Age (months)	L	M	S	Lopt	Mopt	Sopt
0	0.980916	138.238	0.142266	0.980937	140.359	0.141398
1	0.980924	137.424	0.142194	0.980875	139.186	0.141619
2	0.980932	136.611	0.142121	0.980813	138.019	0.14184
3	0.980939	135.799	0.142049	0.980752	136.862	0.142054
4	0.980947	134.989	0.141976	0.980695	135.721	0.142256
5	0.980954	134.183	0.141903	0.980643	134.602	0.14244
6	0.980962	133.381	0.14183	0.980597	133.51	0.142602
7	0.98097	132.585	0.141756	0.980559	132.449	0.142734
8	0.980977	131.797	0.141681	0.980532	131.426	0.142831
9	0.980985	131.018	0.141606	0.980516	130.446	0.142887
10	0.980992	130.249	0.14153	0.980514	129.515	0.142894
11	0.980999	129.492	0.141455	0.980527	128.636	0.142847
12	0.981006	128.747	0.141379	0.980558	127.817	0.142739
13	0.981013	128.016	0.141304	0.980607	127.06	0.142566
14	0.981019	127.3	0.141231	0.980672	126.361	0.142336
15	0.981025	126.598	0.141159	0.980751	125.712	0.142059
16	0.98103	125.911	0.141089	0.980839	125.108	0.141746
17	0.981034	125.241	0.141022	0.980934	124.542	0.141408
18	0.981038	124.585	0.14096	0.981033	124.007	0.141057
19	0.981041	123.946	0.140902	0.981131	123.497	0.140704
20	0.981044	123.322	0.14085	0.981227	123.004	0.14036
21	0.981045	122.713	0.140804	0.981317	122.523	0.140037
22	0.981045	122.119	0.140765	0.981397	122.046	0.139748
23	0.981044	121.54	0.140734	0.981465	121.568	0.139504
24	0.981042	120.975	0.140712	0.981517	121.081	0.139316
25	0.981038	120.424	0.140698	0.98155	120.58	0.139195
26	0.981033	119.886	0.140694	0.981566	120.068	0.139137
27	0.981026	119.362	0.1407	0.981566	119.547	0.139137
28	0.981018	118.851	0.140716	0.981552	119.021	0.139188
29	0.981009	118.353	0.140742	0.981525	118.493	0.139286
30	0.980998	117.867	0.140779	0.981487	117.967	0.139425
31	0.980985	117.394	0.140825	0.981439	117.446	0.139597
32	0.980971	116.933	0.140882	0.981384	116.933	0.139797
33	0.980955	116.484	0.140949	0.981322	116.432	0.140018
34	0.980938	116.047	0.141025	0.981257	115.946	0.140254
35	0.980919	115.622	0.141111	0.981189	115.478	0.140499
36	0.980899	115.209	0.141205	0.98112	115.033	0.140745
37	0.980877	114.807	0.141307	0.981052	114.611	0.140986
38	0.980854	114.416	0.141417	0.980986	114.213	0.141222
39	0.980829	114.037	0.141534	0.980921	113.836	0.141453
40	0.980803	113.668	0.141658	0.980858	113.479	0.141679
41	0.980775	113.309	0.141788	0.980796	113.14	0.141899
42	0.980746	112.961	0.141924	0.980735	112.816	0.142115
43	0.980716	112.622	0.142064	0.980675	112.506	0.142326
44	0.980685	112.292	0.142209	0.980617	112.208	0.142533
45	0.980652	111.971	0.142358	0.980559	111.92	0.142736
46	0.980618	111.657	0.142511	0.980502	111.64	0.142935
47	0.980583	111.352	0.142666	0.980447	111.367	0.143131
48	0.980547	111.054	0.142824	0.980392	111.098	0.143323
49	0.98051	110.762	0.142985	0.980338	110.832	0.143512
50	0.980472	110.477	0.143147	0.980284	110.568	0.143699
51	0.980432	110.197	0.14331	0.980232	110.307	0.143882
52	0.980392	109.923	0.143475	0.98018	110.047	0.144062
53	0.980351	109.654	0.143641	0.98013	109.79	0.144238
54	0.980309	109.389	0.143807	0.98008	109.534	0.14441
55	0.980265	109.129	0.143975	0.980032	109.28	0.144578
56	0.980221	108.872	0.144142	0.979985	109.027	0.144741
57	0.980176	108.618	0.14431	0.979939	108.775	0.1449
58	0.98013	108.368	0.144478	0.979894	108.525	0.145054
59	0.980083	108.12	0.144647	0.979851	108.275	0.145203
60	0.980035	107.876	0.144816	0.979809	108.026	0.145347
61	0.979986	107.633	0.144985	0.979769	107.778	0.145486
62	0.979936	107.393	0.145155	0.97973	107.53	0.14562
63	0.979885	107.155	0.145326	0.979692	107.284	0.14575
64	0.979832	106.919	0.145497	0.979655	107.038	0.145878
65	0.979779	106.685	0.14567	0.979618	106.794	0.146004
66	0.979725	106.453	0.145844	0.979581	106.551	0.14613
67	0.979669	106.223	0.146019	0.979545	106.309	0.146256
68	0.979612	105.994	0.146196	0.979507	106.069	0.146383
69	0.979554	105.767	0.146376	0.97947	105.83	0.146513
70	0.979495	105.542	0.146558	0.979431	105.594	0.146645
71	0.979434	105.319	0.146742	0.97939	105.359	0.146783
72	0.979372	105.097	0.14693	0.979348	105.127	0.146925
73	0.979308	104.877	0.147121	0.979305	104.897	0.147074
74	0.979243	104.659	0.147316	0.979259	104.669	0.14723
75	0.979177	104.442	0.147515	0.979211	104.444	0.147393
76	0.979108	104.228	0.147719	0.979161	104.221	0.147562
77	0.979039	104.015	0.147927	0.979108	104	0.14774
78	0.978967	103.804	0.14814	0.979053	103.782	0.147926
79	0.978894	103.595	0.148359	0.978996	103.567	0.148119
80	0.978819	103.389	0.148582	0.978936	103.354	0.148322
81	0.978742	103.184	0.148812	0.978873	103.145	0.148533
82	0.978663	102.981	0.149048	0.978807	102.938	0.148753
83	0.978583	102.78	0.14929	0.978739	102.734	0.148983
84	0.9785	102.582	0.149539	0.978667	102.533	0.149222
85	0.978416	102.385	0.149794	0.978593	102.335	0.149471
86	0.97833	102.19	0.150056	0.978515	102.139	0.149731
87	0.978241	101.997	0.150324	0.978434	101.947	0.15
88	0.978151	101.807	0.1506	0.97835	101.757	0.150278
89	0.978058	101.618	0.150883	0.978263	101.569	0.150565
90	0.977964	101.43	0.151173	0.978173	101.384	0.150862
91	0.977867	101.245	0.15147	0.978081	101.201	0.151167
92	0.977768	101.061	0.151775	0.977985	101.021	0.151481
93	0.977668	100.879	0.152087	0.977887	100.842	0.151804
94	0.977565	100.699	0.152406	0.977785	100.664	0.152134
95	0.97746	100.52	0.152732	0.977682	100.489	0.152473
96	0.977353	100.342	0.153065	0.977575	100.315	0.152819
97	0.977244	100.165	0.153405	0.977466	100.142	0.153173
98	0.977133	99.9898	0.153752	0.977354	99.9706	0.153534
99	0.97702	99.8152	0.154106	0.97724	99.8001	0.153902
100	0.976905	99.6415	0.154466	0.977124	99.6306	0.154277
101	0.976787	99.4685	0.154833	0.977005	99.4617	0.154658
102	0.976668	99.2961	0.155207	0.976884	99.2934	0.155044
103	0.976547	99.1242	0.155586	0.976761	99.1255	0.155436
104	0.976425	98.9525	0.155972	0.976636	98.9579	0.155834
105	0.9763	98.7811	0.156364	0.976509	98.7903	0.156236
106	0.976174	98.6098	0.156761	0.97638	98.6227	0.156642
107	0.976046	98.4384	0.157163	0.97625	98.4548	0.157053
108	0.975916	98.2668	0.157571	0.976118	98.2865	0.157467
109	0.975784	98.0949	0.157984	0.975984	98.1176	0.157885
110	0.975652	97.9226	0.158402	0.975849	97.9481	0.158306
111	0.975517	97.7498	0.158824	0.975713	97.778	0.15873
112	0.975381	97.5763	0.15925	0.975575	97.607	0.159158
113	0.975244	97.4021	0.159681	0.975435	97.4352	0.159588
114	0.975106	97.2271	0.160115	0.975295	97.2624	0.16002
115	0.974966	97.0511	0.160553	0.975153	97.0887	0.160456
116	0.974826	96.8741	0.160994	0.97501	96.9139	0.160893
117	0.974684	96.696	0.161437	0.974866	96.7379	0.161333
118	0.974541	96.5167	0.161884	0.97472	96.5607	0.161775
119	0.974398	96.3362	0.162333	0.974573	96.3822	0.162219
120	0.974254	96.1544	0.162784	0.974426	96.2024	0.162664
121	0.974109	95.9714	0.163237	0.974277	96.0211	0.163112
122	0.973964	95.7869	0.163692	0.974127	95.8383	0.16356
123	0.973818	95.6011	0.164147	0.973976	95.6541	0.16401
124	0.973672	95.4138	0.164604	0.973825	95.4683	0.164462
125	0.973526	95.2252	0.16506	0.973672	95.2808	0.164915
126	0.97338	95.0351	0.165517	0.973519	95.0918	0.165368
127	0.973233	94.8437	0.165974	0.973365	94.9011	0.165823
128	0.973087	94.6509	0.16643	0.973209	94.7087	0.166278
129	0.972942	94.4567	0.166885	0.973054	94.5146	0.166734
130	0.972796	94.2613	0.167339	0.972897	94.3187	0.167191
131	0.972651	94.0647	0.167791	0.97274	94.121	0.167648
132	0.972507	93.8669	0.168241	0.972582	93.9214	0.168106
133	0.972364	93.668	0.168688	0.972423	93.72	0.168563
134	0.972221	93.4681	0.169132	0.972265	93.5169	0.16902
135	0.97208	93.2674	0.169573	0.972106	93.3124	0.169476
136	0.971939	93.0658	0.170009	0.971947	93.1066	0.169931
137	0.9718	92.8636	0.170441	0.971788	92.8999	0.170382
138	0.971663	92.6609	0.170869	0.97163	92.6923	0.170831
139	0.971527	92.4578	0.171291	0.971473	92.4842	0.171276
140	0.971393	92.2544	0.171707	0.971317	92.2758	0.171717
141	0.97126	92.0508	0.172117	0.971162	92.0672	0.172152
142	0.97113	91.8473	0.17252	0.971009	91.8587	0.172581
143	0.971002	91.644	0.172916	0.970858	91.6506	0.173003
144	0.970876	91.441	0.173304	0.970709	91.443	0.173418
145	0.970752	91.2385	0.173685	0.970563	91.2361	0.173825
146	0.970631	91.0366	0.174056	0.970419	91.0301	0.174223
147	0.970512	90.8355	0.174419	0.970278	90.825	0.174613
148	0.970396	90.6353	0.174772	0.97014	90.621	0.174993
149	0.970283	90.4362	0.175115	0.970005	90.4181	0.175363
150	0.970173	90.2383	0.175448	0.969874	90.2165	0.175724
151	0.970066	90.0419	0.175771	0.969745	90.0163	0.176074
152	0.969962	89.8469	0.176082	0.969621	89.8175	0.176414
153	0.969861	89.6536	0.176382	0.9695	89.6203	0.176743
154	0.969763	89.4621	0.176671	0.969383	89.4247	0.177061
155	0.969669	89.2725	0.176947	0.96927	89.2309	0.177367
156	0.969578	89.0849	0.177211	0.969161	89.0389	0.177661
157	0.969491	88.8994	0.177463	0.969056	88.8489	0.177943
158	0.969407	88.7162	0.177702	0.968957	88.661	0.178212
159	0.969327	88.5353	0.177929	0.968862	88.4755	0.178466
160	0.969251	88.3568	0.178142	0.968773	88.2925	0.178705
161	0.969178	88.1807	0.178343	0.968689	88.1123	0.178929
162	0.969109	88.0072	0.17853	0.968612	87.9351	0.179136
163	0.969043	87.8362	0.178704	0.968541	87.761	0.179325
164	0.968982	87.6679	0.178865	0.968477	87.5902	0.179496
165	0.968924	87.5021	0.179013	0.96842	87.423	0.179647
166	0.968869	87.339	0.179148	0.968371	87.2595	0.179778
167	0.968818	87.1785	0.17927	0.96833	87.1	0.179887
168	0.968771	87.0205	0.17938	0.968297	86.9447	0.179974
169	0.968728	86.865	0.179477	0.968273	86.7935	0.180038
170	0.968688	86.712	0.179562	0.968257	86.6464	0.180081
171	0.968651	86.5614	0.179636	0.968248	86.5029	0.180105
172	0.968618	86.4132	0.179698	0.968245	86.3627	0.180111
173	0.968589	86.2671	0.179749	0.968249	86.2254	0.180101
174	0.968562	86.1231	0.179789	0.968258	86.0906	0.180077
175	0.968539	85.9811	0.17982	0.968272	85.958	0.180042
176	0.968519	85.841	0.17984	0.968289	85.8272	0.179996
177	0.968501	85.7026	0.179852	0.968309	85.6978	0.179942
178	0.968487	85.5659	0.179854	0.968332	85.5695	0.179882
179	0.968475	85.4307	0.179849	0.968356	85.442	0.179818
180	0.968466	85.2968	0.179836	0.968381	85.3148	0.179752
181	0.96846	85.1642	0.179815	0.968406	85.1877	0.179685
182	0.968456	85.0327	0.179788	0.968431	85.0606	0.179618
183	0.968454	84.9022	0.179755	0.968456	84.9334	0.179551
184	0.968455	84.7725	0.179715	0.968481	84.8063	0.179484
185	0.968458	84.6437	0.179671	0.968507	84.6792	0.179416
186	0.968462	84.5156	0.179621	0.968532	84.5521	0.179349
187	0.968469	84.3881	0.179567	0.968557	84.4249	0.179281
188	0.968477	84.2611	0.179509	0.968583	84.2978	0.179213
189	0.968487	84.1345	0.179447	0.968609	84.1707	0.179144
190	0.968499	84.0083	0.179382	0.968634	84.0436	0.179076
191	0.968512	83.8823	0.179314	0.96866	83.9164	0.179007
192	0.968527	83.7567	0.179243	0.968686	83.7893	0.178938
193	0.968542	83.6312	0.17917	0.968712	83.6622	0.178869
194	0.968559	83.5058	0.179094	0.968737	83.5351	0.1788
195	0.968577	83.3806	0.179017	0.968763	83.408	0.17873
196	0.968596	83.2554	0.178938	0.968789	83.2808	0.17866
197	0.968616	83.1302	0.178858	0.968816	83.1537	0.17859
198	0.968637	83.0051	0.178776	0.968842	83.0266	0.17852
199	0.968658	82.88	0.178694	0.968868	82.8995	0.178449
200	0.96868	82.7548	0.17861	0.968894	82.7723	0.178379
201	0.968703	82.6297	0.178526	0.968921	82.6452	0.178308
202	0.968726	82.5044	0.178441	0.968947	82.5181	0.178237
203	0.96875	82.3792	0.178356	0.968974	82.391	0.178165
204	0.968774	82.2538	0.17827	0.969	82.2638	0.178094
205	0.968798	82.1285	0.178184	0.969027	82.1367	0.178022
206	0.968823	82.0031	0.178098	0.969054	82.0096	0.17795
207	0.968848	81.8776	0.178011	0.96908	81.8825	0.177878
208	0.968873	81.7521	0.177925	0.969107	81.7553	0.177806
209	0.968898	81.6266	0.177838	0.969134	81.6282	0.177733
210	0.968923	81.501	0.177751	0.969161	81.5011	0.17766
211	0.968949	81.3754	0.177664	0.969188	81.374	0.177587
212	0.968974	81.2498	0.177577	0.969216	81.2468	0.177514
213	0.969	81.1242	0.17749	0.969243	81.1197	0.17744
214	0.969025	80.9985	0.177403	0.96927	80.9926	0.177366
215	0.969051	80.8729	0.177316	0.969297	80.8655	0.177292
216	0.969077	80.7472	0.177229	0.969325	80.7383	0.177218

## Sheet: RR
Age (months)	L	M	S	Lopt	Mopt	Sopt
0	0.965095	38.2865	0.194011	0.955326	40.2975	0.210899
1	0.965488	37.6969	0.192369	0.956968	39.4097	0.207318
2	0.965881	37.1079	0.190728	0.95863	38.5258	0.203608
3	0.966273	36.5199	0.189091	0.960297	37.6496	0.199793
4	0.966664	35.9341	0.187461	0.961954	36.7852	0.195903
5	0.967054	35.3515	0.185841	0.963584	35.9365	0.191974
6	0.967441	34.7736	0.184236	0.965171	35.1076	0.188044
7	0.967826	34.2017	0.18265	0.966698	34.3024	0.184159
8	0.968207	33.6374	0.18109	0.968147	33.525	0.180371
9	0.968583	33.0823	0.179559	0.969502	32.7792	0.176737
10	0.968954	32.5378	0.178063	0.970744	32.0692	0.173322
11	0.969319	32.0054	0.176608	0.971853	31.399	0.170196
12	0.969678	31.4864	0.175197	0.972813	30.7724	0.167436
13	0.970029	30.9822	0.173835	0.973608	30.1925	0.165104
14	0.970372	30.4938	0.172526	0.974247	29.6575	0.163201
15	0.970706	30.0223	0.171272	0.974744	29.1649	0.161703
16	0.971032	29.5684	0.170077	0.975112	28.7118	0.160581
17	0.971348	29.1328	0.168941	0.975367	28.2955	0.1598
18	0.971654	28.716	0.167866	0.975522	27.9132	0.15932
19	0.97195	28.3183	0.166852	0.975594	27.5623	0.159097
20	0.972235	27.9399	0.1659	0.975599	27.2399	0.159081
21	0.972511	27.5809	0.165008	0.975554	26.9434	0.159221
22	0.972775	27.2412	0.164176	0.975477	26.67	0.15946
23	0.973029	26.9205	0.163401	0.975386	26.4169	0.159739
24	0.973273	26.6184	0.162683	0.975302	26.1814	0.159997
25	0.973506	26.3347	0.162018	0.975242	25.9611	0.160182
26	0.973729	26.0689	0.161405	0.975207	25.7549	0.160289
27	0.973941	25.8202	0.160842	0.975196	25.5624	0.160325
28	0.974143	25.5882	0.160324	0.975204	25.3826	0.160298
29	0.974336	25.372	0.159851	0.975231	25.2151	0.160216
30	0.974519	25.1711	0.15942	0.975273	25.0591	0.160088
31	0.974692	24.9847	0.159027	0.975327	24.914	0.159922
32	0.974856	24.8119	0.158671	0.97539	24.779	0.159727
33	0.975011	24.652	0.15835	0.97546	24.6537	0.159513
34	0.975158	24.5043	0.15806	0.975532	24.5372	0.159289
35	0.975296	24.3679	0.157799	0.975605	24.4289	0.159065
36	0.975426	24.242	0.157566	0.975674	24.3282	0.158851
37	0.975548	24.1259	0.157357	0.975737	24.2345	0.158655
38	0.975662	24.0188	0.157172	0.975794	24.147	0.158478
39	0.975769	23.92	0.157009	0.975845	24.0653	0.158318
40	0.975869	23.8288	0.156865	0.975892	23.9888	0.158174
41	0.975962	23.7444	0.156738	0.975934	23.9169	0.158043
42	0.976048	23.6663	0.156628	0.975971	23.8492	0.157925
43	0.976129	23.5938	0.156532	0.976006	23.7849	0.157818
44	0.976203	23.5263	0.156449	0.976037	23.7235	0.15772
45	0.976272	23.4633	0.156377	0.976066	23.6645	0.15763
46	0.976335	23.4043	0.156316	0.976093	23.6073	0.157544
47	0.976394	23.3488	0.156265	0.976119	23.5513	0.157463
48	0.976447	23.2963	0.156221	0.976144	23.4961	0.157384
49	0.976497	23.2465	0.156184	0.976169	23.441	0.157306
50	0.976541	23.199	0.156153	0.976194	23.3861	0.157227
51	0.976582	23.1534	0.156128	0.976219	23.3315	0.15715
52	0.976619	23.1096	0.156107	0.976243	23.2773	0.157073
53	0.976653	23.0672	0.15609	0.976268	23.2235	0.156997
54	0.976683	23.026	0.156075	0.976291	23.1703	0.156923
55	0.976711	22.9858	0.156063	0.976315	23.1177	0.15685
56	0.976735	22.9464	0.156053	0.976337	23.0658	0.156778
57	0.976757	22.9078	0.156044	0.976359	23.0148	0.156709
58	0.976776	22.8698	0.156036	0.976381	22.9647	0.156642
59	0.976793	22.8323	0.156029	0.976401	22.9156	0.156577
60	0.976809	22.7952	0.156022	0.976421	22.8675	0.156514
61	0.976822	22.7585	0.156015	0.97644	22.8206	0.156455
62	0.976834	22.722	0.156007	0.976458	22.7749	0.156398
63	0.976844	22.6859	0.155999	0.976475	22.7302	0.156344
64	0.976853	22.6499	0.15599	0.976491	22.6866	0.156292
65	0.976861	22.6143	0.155979	0.976507	22.644	0.156242
66	0.976868	22.5788	0.155968	0.976522	22.6024	0.156194
67	0.976874	22.5435	0.155955	0.976537	22.5616	0.156148
68	0.97688	22.5084	0.155941	0.976551	22.5218	0.156103
69	0.976884	22.4736	0.155925	0.976565	22.4827	0.15606
70	0.976889	22.4389	0.155907	0.976578	22.4445	0.156018
71	0.976893	22.4044	0.155888	0.976591	22.407	0.155977
72	0.976897	22.3702	0.155866	0.976604	22.3701	0.155937
73	0.976901	22.3362	0.155843	0.976616	22.334	0.155897
74	0.976904	22.3024	0.155817	0.976629	22.2984	0.155857
75	0.976909	22.2689	0.155789	0.976641	22.2635	0.155818
76	0.976913	22.2356	0.155759	0.976653	22.2291	0.155778
77	0.976917	22.2026	0.155727	0.976666	22.1952	0.155738
78	0.976922	22.1698	0.155692	0.976679	22.1619	0.155697
79	0.976928	22.1373	0.155654	0.976692	22.129	0.155656
80	0.976934	22.105	0.155614	0.976705	22.0966	0.155613
81	0.97694	22.073	0.155572	0.976719	22.0647	0.155569
82	0.976948	22.0413	0.155526	0.976734	22.0331	0.155523
83	0.976956	22.0098	0.155478	0.976749	22.002	0.155475
84	0.976965	21.9785	0.155427	0.976764	21.9711	0.155426
85	0.976975	21.9475	0.155373	0.976781	21.9406	0.155373
86	0.976986	21.9167	0.155316	0.976798	21.9105	0.155319
87	0.976998	21.8862	0.155255	0.976816	21.8805	0.155261
88	0.977011	21.8558	0.155192	0.976835	21.8509	0.155201
89	0.977025	21.8257	0.155125	0.976855	21.8214	0.155138
90	0.97704	21.7957	0.155055	0.976876	21.7922	0.155071
91	0.977056	21.7659	0.154982	0.976897	21.7631	0.155001
92	0.977074	21.7363	0.154905	0.97692	21.7342	0.154928
93	0.977092	21.7068	0.154824	0.976944	21.7054	0.154851
94	0.977112	21.6774	0.15474	0.97697	21.6767	0.154771
95	0.977134	21.6482	0.154652	0.976996	21.6481	0.154687
96	0.977157	21.6191	0.154561	0.977024	21.6196	0.154598
97	0.977181	21.59	0.154466	0.977053	21.5911	0.154505
98	0.977206	21.561	0.154366	0.977083	21.5626	0.154409
99	0.977233	21.532	0.154263	0.977114	21.5342	0.154307
100	0.977261	21.5031	0.154156	0.977147	21.5057	0.154202
101	0.97729	21.4743	0.154045	0.977181	21.4772	0.154092
102	0.977321	21.4454	0.15393	0.977217	21.4488	0.153978
103	0.977354	21.4165	0.15381	0.977253	21.4202	0.15386
104	0.977388	21.3876	0.153687	0.977292	21.3917	0.153737
105	0.977423	21.3587	0.153559	0.977331	21.3631	0.15361
106	0.97746	21.3297	0.153427	0.977372	21.3345	0.153478
107	0.977498	21.3007	0.153291	0.977414	21.3058	0.153342
108	0.977538	21.2716	0.15315	0.977457	21.277	0.153201
109	0.977579	21.2424	0.153006	0.977502	21.2481	0.153055
110	0.977621	21.2132	0.152856	0.977549	21.2192	0.152906
111	0.977665	21.1838	0.152703	0.977596	21.1901	0.152751
112	0.977711	21.1544	0.152545	0.977645	21.161	0.152592
113	0.977758	21.1249	0.152383	0.977695	21.1317	0.152429
114	0.977806	21.0953	0.152216	0.977747	21.1023	0.152261
115	0.977856	21.0656	0.152045	0.9778	21.0728	0.152088
116	0.977907	21.0358	0.151869	0.977854	21.0431	0.151911
117	0.977959	21.0059	0.15169	0.977909	21.0133	0.15173
118	0.978013	20.9759	0.151505	0.977966	20.9833	0.151544
119	0.978068	20.9458	0.151317	0.978024	20.9532	0.151354
120	0.978125	20.9157	0.151124	0.978083	20.9229	0.151159
121	0.978183	20.8854	0.150926	0.978144	20.8925	0.15096
122	0.978242	20.8551	0.150725	0.978205	20.8618	0.150756
123	0.978302	20.8247	0.150519	0.978268	20.8311	0.150548
124	0.978364	20.7943	0.150309	0.978332	20.8002	0.150336
125	0.978427	20.7638	0.150094	0.978398	20.7693	0.15012
126	0.978491	20.7333	0.149875	0.978464	20.7383	0.149899
127	0.978557	20.7028	0.149652	0.978532	20.7072	0.149674
128	0.978623	20.6723	0.149425	0.9786	20.6762	0.149445
129	0.978691	20.6418	0.149194	0.97867	20.6451	0.149212
130	0.97876	20.6113	0.148958	0.978741	20.6141	0.148975
131	0.978831	20.5809	0.148718	0.978813	20.5832	0.148734
132	0.978902	20.5505	0.148475	0.978886	20.5523	0.148489
133	0.978975	20.5203	0.148227	0.97896	20.5215	0.148241
134	0.979048	20.4901	0.147975	0.979035	20.4909	0.147988
135	0.979123	20.4601	0.14772	0.979111	20.4604	0.147731
136	0.979198	20.4302	0.14746	0.979188	20.4301	0.147471
137	0.979275	20.4005	0.147197	0.979266	20.3999	0.147207
138	0.979353	20.3709	0.146929	0.979344	20.37	0.146939
139	0.979431	20.3416	0.146658	0.979424	20.3402	0.146668
140	0.979511	20.3124	0.146383	0.979505	20.3108	0.146393
141	0.979592	20.2836	0.146105	0.979586	20.2815	0.146114
142	0.979673	20.2549	0.145822	0.979668	20.2526	0.145832
143	0.979755	20.2265	0.145536	0.979752	20.2239	0.145546
144	0.979838	20.1985	0.145247	0.979836	20.1956	0.145256
145	0.979923	20.1707	0.144954	0.97992	20.1676	0.144963
146	0.980007	20.1432	0.144657	0.980006	20.1399	0.144667
147	0.980093	20.1161	0.144357	0.980092	20.1126	0.144368
148	0.980179	20.0893	0.144053	0.980179	20.0856	0.144065
149	0.980267	20.0629	0.143747	0.980267	20.059	0.143758
150	0.980354	20.0369	0.143436	0.980356	20.0327	0.143449
151	0.980443	20.0113	0.143123	0.980445	20.0069	0.143136
152	0.980532	19.9861	0.142806	0.980535	19.9814	0.14282
153	0.980622	19.9612	0.142486	0.980625	19.9562	0.142501
154	0.980713	19.9369	0.142163	0.980717	19.9315	0.14218
155	0.980804	19.9129	0.141837	0.980808	19.9071	0.141855
156	0.980896	19.8894	0.141508	0.980901	19.8832	0.141527
157	0.980988	19.8663	0.141176	0.980994	19.8597	0.141196
158	0.981081	19.8437	0.140841	0.981087	19.8365	0.140863
159	0.981174	19.8216	0.140503	0.981181	19.8139	0.140526
160	0.981268	19.7999	0.140162	0.981275	19.7917	0.140187
161	0.981362	19.7787	0.139819	0.98137	19.77	0.139845
162	0.981457	19.758	0.139473	0.981466	19.7488	0.139499
163	0.981552	19.7377	0.139124	0.981562	19.7281	0.139151
164	0.981648	19.7179	0.138773	0.981659	19.7081	0.1388
165	0.981744	19.6985	0.138419	0.981756	19.6886	0.138446
166	0.98184	19.6796	0.138063	0.981854	19.6697	0.138089
167	0.981937	19.6611	0.137704	0.981952	19.6514	0.137728
168	0.982034	19.6431	0.137344	0.982051	19.6337	0.137365
169	0.982131	19.6255	0.136981	0.98215	19.6168	0.136999
170	0.982229	19.6083	0.136616	0.98225	19.6004	0.13663
171	0.982326	19.5914	0.136249	0.98235	19.5846	0.136259
172	0.982424	19.575	0.135879	0.982451	19.5693	0.135885
173	0.982523	19.5589	0.135509	0.982551	19.5545	0.135509
174	0.982621	19.5431	0.135136	0.982652	19.54	0.135131
175	0.98272	19.5277	0.134761	0.982753	19.5259	0.134751
176	0.982819	19.5125	0.134385	0.982855	19.512	0.13437
177	0.982918	19.4976	0.134007	0.982956	19.4984	0.133988
178	0.983017	19.483	0.133628	0.983057	19.485	0.133604
179	0.983116	19.4686	0.133248	0.983158	19.4716	0.13322
180	0.983215	19.4544	0.132866	0.983258	19.4583	0.132835
181	0.983315	19.4404	0.132482	0.983359	19.4451	0.132449
182	0.983414	19.4266	0.132098	0.98346	19.4318	0.132063
183	0.983514	19.4129	0.131712	0.98356	19.4185	0.131676
184	0.983613	19.3993	0.131326	0.98366	19.4052	0.131289
185	0.983713	19.3859	0.130938	0.98376	19.392	0.130901
186	0.983812	19.3725	0.13055	0.983859	19.3787	0.130513
187	0.983912	19.3592	0.13016	0.983959	19.3654	0.130124
188	0.984011	19.3461	0.12977	0.984058	19.3521	0.129735
189	0.984111	19.3329	0.129379	0.984157	19.3388	0.129345
190	0.984211	19.3199	0.128987	0.984256	19.3256	0.128955
191	0.98431	19.3068	0.128595	0.984354	19.3123	0.128564
192	0.98441	19.2938	0.128201	0.984453	19.299	0.128172
193	0.984509	19.2808	0.127808	0.984551	19.2857	0.12778
194	0.984609	19.2678	0.127413	0.984649	19.2724	0.127388
195	0.984708	19.2549	0.127019	0.984747	19.2591	0.126995
196	0.984808	19.2419	0.126624	0.984844	19.2459	0.126601
197	0.984907	19.229	0.126228	0.984942	19.2326	0.126207
198	0.985007	19.216	0.125832	0.985039	19.2193	0.125812
199	0.985106	19.2031	0.125435	0.985136	19.206	0.125417
200	0.985205	19.1901	0.125039	0.985232	19.1927	0.125021
201	0.985305	19.1771	0.124642	0.985329	19.1794	0.124625
202	0.985404	19.1642	0.124244	0.985425	19.1662	0.124228
203	0.985503	19.1512	0.123847	0.985521	19.1529	0.123831
204	0.985602	19.1382	0.123449	0.985617	19.1396	0.123433
205	0.985701	19.1252	0.123051	0.985713	19.1263	0.123034
206	0.9858	19.1121	0.122653	0.985808	19.113	0.122635
207	0.985899	19.0991	0.122254	0.985903	19.0997	0.122236
208	0.985998	19.0861	0.121856	0.985998	19.0865	0.121835
209	0.986097	19.073	0.121457	0.986093	19.0732	0.121435
210	0.986197	19.06	0.121059	0.986188	19.0599	0.121034
211	0.986296	19.0469	0.12066	0.986282	19.0466	0.120632
212	0.986395	19.0339	0.120261	0.986376	19.0333	0.120229
213	0.986494	19.0208	0.119863	0.98647	19.02	0.119826
214	0.986592	19.0078	0.119464	0.986564	19.0067	0.119423
215	0.986691	18.9947	0.119065	0.986657	18.9935	0.119019
216	0.98679	18.9817	0.118666	0.98675	18.9802	0.118614
