# Supplementary material for: Streamlining Pediatric Vital Sign Assessment: Innovations and Insights
Source: Research Square preprint supplement (doi:10.21203/rs.3.rs-4173106/v1), 2024-04-11
Supplement: Supplementary file 1 [file e319af9dbbb1da5c99345544.docx]

Table S1. Centile chart of systolic blood pressure according to age.

| Age | Systolic blood pressure (mmHg) | | | | | | | | |
| --- | --- | --- | --- | --- | --- | --- | --- | --- | --- |
| 1st centile | 3rd centile | 10th centile | 25th centile | 50th centile | 75th centile | 90th centile | 97th centile | 99th centile |
| 1 month | 59 | 65 | 74 | 82 | 91 | 101 | 109 | 117 | 123 |
| 2 months | 60 | 66 | 74 | 83 | 92 | 102 | 110 | 118 | 125 |
| 3 months | 61 | 67 | 75 | 84 | 93 | 103 | 111 | 120 | 126 |
| 4 months | 61 | 68 | 76 | 85 | 94 | 104 | 112 | 121 | 127 |
| 5 months | 62 | 68 | 77 | 85 | 95 | 105 | 113 | 122 | 128 |
| 6 months | 63 | 69 | 78 | 86 | 96 | 105 | 114 | 123 | 129 |
| 7 months | 63 | 70 | 78 | 87 | 97 | 106 | 115 | 123 | 130 |
| 8 months | 64 | 70 | 79 | 88 | 97 | 107 | 116 | 124 | 131 |
| 9 months | 65 | 71 | 80 | 88 | 98 | 107 | 116 | 125 | 131 |
| 10 months | 65 | 72 | 80 | 89 | 98 | 108 | 117 | 125 | 131 |
| 11 months | 66 | 72 | 81 | 89 | 99 | 108 | 117 | 125 | 132 |
| 12 months | 66 | 73 | 81 | 90 | 99 | 109 | 117 | 126 | 132 |
| 2 years | 72 | 78 | 86 | 94 | 103 | 111 | 120 | 127 | 133 |
| 3 years | 75 | 80 | 88 | 96 | 104 | 113 | 120 | 128 | 133 |
| 4 years | 76 | 82 | 89 | 96 | 105 | 113 | 120 | 128 | 133 |
| 5 years | 77 | 83 | 90 | 97 | 105 | 113 | 121 | 128 | 133 |
| 6 years | 79 | 84 | 91 | 99 | 107 | 115 | 122 | 130 | 135 |
| 7 years | 80 | 85 | 93 | 100 | 108 | 117 | 124 | 132 | 137 |
| 8 years | 81 | 86 | 94 | 102 | 110 | 119 | 126 | 134 | 139 |
| 9 years | 82 | 87 | 95 | 103 | 112 | 120 | 128 | 136 | 142 |
| 10 years | 82 | 88 | 96 | 104 | 113 | 122 | 130 | 138 | 144 |
| 11 years | 83 | 89 | 97 | 106 | 115 | 124 | 132 | 141 | 147 |
| 12 years | 84 | 90 | 98 | 107 | 116 | 126 | 135 | 143 | 149 |
| 13 years | 84 | 91 | 99 | 108 | 118 | 128 | 137 | 145 | 152 |
| 14 years | 85 | 91 | 100 | 110 | 120 | 130 | 139 | 148 | 155 |
| 15 years | 85 | 92 | 101 | 111 | 121 | 132 | 141 | 150 | 157 |
| 16 years | 86 | 93 | 102 | 112 | 123 | 134 | 143 | 153 | 160 |
| 17 years | 86 | 93 | 103 | 113 | 124 | 135 | 145 | 155 | 163 |
| 18 years | 86 | 94 | 104 | 114 | 126 | 137 | 148 | 158 | 165 |

Table S2. Centile chart of diastolic blood pressure according to age.

| Age | Diastolic blood pressure (mmHg) | | | | | | | | |
| --- | --- | --- | --- | --- | --- | --- | --- | --- | --- |
| 1st centile | 3rd centile | 10th centile | 25th centile | 50th centile | 75th centile | 90th centile | 97th centile | 99th centile |
| 1 month | 28 | 34 | 40 | 47 | 55 | 63 | 70 | 77 | 82 |
| 2 months | 29 | 34 | 41 | 48 | 56 | 64 | 71 | 78 | 83 |
| 3 months | 30 | 35 | 42 | 49 | 57 | 64 | 71 | 78 | 83 |
| 4 months | 31 | 36 | 43 | 50 | 57 | 65 | 72 | 79 | 84 |
| 5 months | 31 | 36 | 43 | 50 | 58 | 65 | 72 | 79 | 84 |
| 6 months | 32 | 37 | 44 | 51 | 58 | 66 | 73 | 80 | 85 |
| 7 months | 33 | 38 | 44 | 51 | 59 | 66 | 73 | 80 | 85 |
| 8 months | 33 | 38 | 45 | 52 | 59 | 67 | 74 | 81 | 86 |
| 9 months | 34 | 39 | 45 | 52 | 60 | 67 | 74 | 81 | 86 |
| 10 months | 34 | 39 | 46 | 52 | 60 | 68 | 74 | 81 | 86 |
| 11 months | 34 | 39 | 46 | 53 | 60 | 68 | 75 | 81 | 86 |
| 12 months | 35 | 40 | 46 | 53 | 61 | 68 | 75 | 82 | 87 |
| 2 years | 37 | 42 | 49 | 55 | 63 | 70 | 77 | 83 | 88 |
| 3 years | 39 | 44 | 50 | 57 | 64 | 71 | 78 | 84 | 89 |
| 4 years | 40 | 45 | 51 | 58 | 65 | 72 | 78 | 85 | 89 |
| 5 years | 41 | 46 | 52 | 58 | 66 | 73 | 79 | 85 | 90 |
| 6 years | 42 | 47 | 53 | 60 | 67 | 74 | 80 | 86 | 91 |
| 7 years | 43 | 48 | 54 | 61 | 68 | 75 | 81 | 87 | 92 |
| 8 years | 44 | 49 | 55 | 61 | 68 | 75 | 81 | 88 | 92 |
| 9 years | 45 | 49 | 56 | 62 | 69 | 76 | 82 | 88 | 93 |
| 10 years | 45 | 50 | 56 | 63 | 70 | 77 | 83 | 89 | 94 |
| 11 years | 46 | 51 | 57 | 63 | 70 | 77 | 84 | 90 | 95 |
| 12 years | 47 | 51 | 58 | 64 | 71 | 78 | 85 | 91 | 96 |
| 13 years | 47 | 52 | 58 | 65 | 72 | 79 | 86 | 92 | 97 |
| 14 years | 48 | 53 | 59 | 66 | 73 | 80 | 86 | 93 | 98 |
| 15 years | 49 | 53 | 60 | 66 | 74 | 81 | 87 | 94 | 99 |
| 16 years | 49 | 54 | 61 | 67 | 74 | 82 | 88 | 95 | 99 |
| 17 years | 50 | 55 | 61 | 68 | 75 | 83 | 89 | 96 | 100 |
| 18 years | 51 | 55 | 62 | 69 | 76 | 83 | 90 | 97 | 101 |

Table S3. Centile chart of mean blood pressure according to age group.

| Age | Mean blood pressure (mmHg) | | | | | | | | |
| --- | --- | --- | --- | --- | --- | --- | --- | --- | --- |
| 1st centile | 3rd centile | 10th centile | 25th centile | 50th centile | 75th centile | 90th centile | 97th centile | 99th centile |
| 1 month | 41 | 46 | 53 | 60 | 67 | 75 | 82 | 89 | 94 |
| 2 months | 42 | 47 | 53 | 60 | 68 | 76 | 83 | 89 | 94 |
| 3 months | 42 | 47 | 54 | 61 | 69 | 76 | 83 | 90 | 95 |
| 4 months | 43 | 48 | 55 | 62 | 70 | 77 | 84 | 91 | 96 |
| 5 months | 44 | 49 | 56 | 63 | 70 | 78 | 85 | 91 | 97 |
| 6 months | 45 | 50 | 56 | 63 | 71 | 78 | 85 | 92 | 97 |
| 7 months | 45 | 50 | 57 | 64 | 71 | 79 | 86 | 93 | 98 |
| 8 months | 46 | 51 | 58 | 64 | 72 | 80 | 86 | 93 | 98 |
| 9 months | 46 | 51 | 58 | 65 | 72 | 80 | 87 | 93 | 98 |
| 10 months | 47 | 52 | 58 | 65 | 73 | 80 | 87 | 94 | 99 |
| 11 months | 47 | 52 | 59 | 66 | 73 | 81 | 87 | 94 | 99 |
| 12 months | 48 | 53 | 59 | 66 | 73 | 81 | 88 | 94 | 99 |
| 2 years | 51 | 56 | 63 | 69 | 76 | 83 | 90 | 96 | 101 |
| 3 years | 54 | 58 | 64 | 71 | 78 | 84 | 91 | 97 | 101 |
| 4 years | 55 | 59 | 65 | 71 | 78 | 85 | 91 | 97 | 102 |
| 5 years | 56 | 60 | 66 | 72 | 79 | 86 | 92 | 97 | 102 |
| 6 years | 57 | 61 | 67 | 73 | 80 | 87 | 93 | 99 | 103 |
| 7 years | 58 | 62 | 68 | 74 | 81 | 88 | 94 | 100 | 104 |
| 8 years | 59 | 63 | 69 | 75 | 82 | 89 | 95 | 101 | 105 |
| 9 years | 60 | 64 | 70 | 76 | 83 | 90 | 96 | 102 | 107 |
| 10 years | 60 | 65 | 71 | 77 | 84 | 91 | 97 | 104 | 108 |
| 11 years | 61 | 66 | 72 | 78 | 85 | 92 | 99 | 105 | 109 |
| 12 years | 62 | 67 | 73 | 79 | 86 | 93 | 100 | 106 | 111 |
| 13 years | 62 | 67 | 74 | 80 | 87 | 95 | 101 | 107 | 112 |
| 14 years | 63 | 68 | 74 | 81 | 88 | 96 | 102 | 109 | 114 |
| 15 years | 64 | 69 | 75 | 82 | 89 | 97 | 103 | 110 | 115 |
| 16 years | 64 | 69 | 76 | 83 | 90 | 98 | 105 | 111 | 116 |
| 17 years | 65 | 70 | 77 | 84 | 91 | 99 | 106 | 113 | 118 |
| 18 years | 65 | 70 | 77 | 84 | 92 | 100 | 107 | 114 | 119 |

Table S4. Centile chart of heart rate according to age.

| Age | Heart rate (beats/minute) | | | | | | | | |
| --- | --- | --- | --- | --- | --- | --- | --- | --- | --- |
| 1st centile | 3rd centile | 10th centile | 25th centile | 50th centile | 75th centile | 90th centile | 97th centile | 99th centile |
| 1 month | 94 | 103 | 115 | 127 | 140 | 154 | 166 | 178 | 187 |
| 2 months | 93 | 102 | 114 | 126 | 139 | 153 | 164 | 176 | 185 |
| 3 months | 93 | 101 | 113 | 125 | 138 | 151 | 163 | 175 | 184 |
| 4 months | 92 | 100 | 112 | 124 | 137 | 150 | 162 | 173 | 182 |
| 5 months | 91 | 99 | 111 | 123 | 136 | 149 | 160 | 172 | 181 |
| 6 months | 90 | 99 | 110 | 122 | 135 | 148 | 159 | 171 | 179 |
| 7 months | 89 | 98 | 109 | 121 | 134 | 146 | 158 | 169 | 178 |
| 8 months | 89 | 97 | 108 | 120 | 132 | 145 | 157 | 168 | 176 |
| 9 months | 88 | 96 | 107 | 119 | 131 | 144 | 156 | 167 | 175 |
| 10 months | 87 | 95 | 107 | 118 | 130 | 143 | 154 | 166 | 174 |
| 11 months | 86 | 95 | 106 | 117 | 130 | 142 | 153 | 164 | 173 |
| 12 months | 86 | 94 | 105 | 116 | 129 | 141 | 152 | 163 | 171 |
| 2 years | 82 | 90 | 100 | 110 | 122 | 133 | 143 | 153 | 161 |
| 3 years | 78 | 85 | 95 | 105 | 115 | 126 | 136 | 146 | 153 |
| 4 years | 74 | 81 | 91 | 101 | 111 | 122 | 132 | 141 | 148 |
| 5 years | 72 | 79 | 88 | 98 | 108 | 119 | 128 | 138 | 145 |
| 6 years | 69 | 76 | 86 | 95 | 105 | 116 | 125 | 134 | 141 |
| 7 years | 67 | 74 | 83 | 92 | 103 | 113 | 122 | 132 | 138 |
| 8 years | 65 | 72 | 81 | 90 | 101 | 111 | 120 | 129 | 136 |
| 9 years | 63 | 69 | 79 | 88 | 98 | 109 | 118 | 128 | 134 |
| 10 years | 60 | 67 | 76 | 86 | 96 | 107 | 116 | 126 | 133 |
| 11 years | 57 | 64 | 74 | 84 | 94 | 105 | 114 | 124 | 131 |
| 12 years | 55 | 62 | 71 | 81 | 92 | 102 | 112 | 121 | 129 |
| 13 years | 52 | 60 | 69 | 79 | 89 | 100 | 110 | 119 | 126 |
| 14 years | 51 | 58 | 67 | 77 | 87 | 98 | 107 | 117 | 124 |
| 15 years | 50 | 57 | 66 | 75 | 85 | 96 | 105 | 114 | 121 |
| 16 years | 49 | 56 | 65 | 74 | 84 | 94 | 103 | 112 | 119 |
| 17 years | 48 | 55 | 64 | 73 | 82 | 92 | 101 | 110 | 117 |
| 18 years | 48 | 54 | 63 | 71 | 81 | 91 | 99 | 108 | 114 |

Table S5. Centile chart of respiratory rate according to age.

| Age | Respiratory rate (breaths/minute) | | | | | | | | |
| --- | --- | --- | --- | --- | --- | --- | --- | --- | --- |
| 1st centile | 3rd centile | 10th centile | 25th centile | 50th centile | 75th centile | 90th centile | 97th centile | 99th centile |
| 1 month | 21 | 24 | 29 | 35 | 40 | 46 | 51 | 56 | 60 |
| 2 months | 20 | 24 | 29 | 34 | 39 | 45 | 50 | 55 | 58 |
| 3 months | 20 | 24 | 29 | 33 | 39 | 44 | 49 | 53 | 57 |
| 4 months | 20 | 24 | 28 | 33 | 38 | 43 | 47 | 52 | 55 |
| 5 months | 20 | 23 | 28 | 32 | 37 | 42 | 46 | 50 | 54 |
| 6 months | 20 | 23 | 27 | 31 | 36 | 41 | 45 | 49 | 52 |
| 7 months | 20 | 23 | 27 | 31 | 35 | 40 | 44 | 48 | 50 |
| 8 months | 20 | 22 | 26 | 30 | 34 | 39 | 42 | 46 | 49 |
| 9 months | 19 | 22 | 26 | 29 | 34 | 38 | 41 | 45 | 48 |
| 10 months | 19 | 22 | 25 | 29 | 33 | 37 | 40 | 44 | 46 |
| 11 months | 19 | 22 | 25 | 28 | 32 | 36 | 39 | 43 | 45 |
| 12 months | 19 | 21 | 25 | 28 | 31 | 35 | 38 | 41 | 44 |
| 2 years | 17 | 18 | 21 | 24 | 26 | 29 | 32 | 34 | 36 |
| 3 years | 15 | 17 | 19 | 22 | 24 | 27 | 29 | 32 | 33 |
| 4 years | 15 | 17 | 19 | 21 | 24 | 26 | 28 | 31 | 32 |
| 5 years | 15 | 16 | 18 | 21 | 23 | 25 | 28 | 30 | 31 |
| 6 years | 14 | 16 | 18 | 20 | 22 | 25 | 27 | 29 | 31 |
| 7 years | 14 | 16 | 18 | 20 | 22 | 24 | 26 | 28 | 30 |
| 8 years | 14 | 15 | 17 | 19 | 22 | 24 | 26 | 28 | 29 |
| 9 years | 14 | 15 | 17 | 19 | 21 | 24 | 25 | 27 | 29 |
| 10 years | 14 | 15 | 17 | 19 | 21 | 23 | 25 | 27 | 28 |
| 11 years | 13 | 15 | 17 | 19 | 21 | 23 | 25 | 26 | 28 |
| 12 years | 13 | 15 | 16 | 18 | 20 | 22 | 24 | 26 | 27 |
| 13 years | 13 | 15 | 16 | 18 | 20 | 22 | 24 | 25 | 26 |
| 14 years | 13 | 15 | 16 | 18 | 20 | 21 | 23 | 25 | 26 |
| 15 years | 13 | 15 | 16 | 18 | 19 | 21 | 23 | 24 | 26 |
| 16 years | 14 | 15 | 16 | 18 | 19 | 21 | 22 | 24 | 25 |
| 17 years | 14 | 15 | 16 | 18 | 19 | 21 | 22 | 24 | 25 |
| 18 years | 14 | 15 | 16 | 17 | 19 | 21 | 22 | 23 | 24 |
